# Supplementary material for: Self-powered NH3 synthesis by trifunctional Co2B-based high power density Zn–air batteries
Source: Royal Society of Chemistry journal article supplement (doi:10.1039/d3ta02178e), 2023-01-01
Supplement: d3ta02178e1.pdf [file d3ta02178e1.pdf]

## Supporting Information

### Self-powered NH<sub>3</sub> synthesis by trifunctional Co<sub>2</sub>B based high power density Zn-air batteries

Divyani Gupta,<sup>a</sup> Alankar Kafle,<sup>a</sup> Prajna Parimita Mohanty,<sup>b,c</sup> Tisita Das,<sup>c</sup> Sudip Chakraborty,<sup>c</sup> Rajeev Ahuja,<sup>b,d</sup> Tharamani C. Nagaiah<sup>a\*</sup>

<sup>a</sup>Department of Chemistry, <sup>b</sup>Department of Physics, Indian Institute of Technology Ropar, Rupnagar, Punjab-140001, India

<sup>c</sup>Materials Theory for Energy Scavenging (MATES) Lab, Harish-Chandra Research Institute(HRI)Allahabad, HBNI, Chhatnag Road, Jhansi, Prayagraj (Allahabad) 211019 India

<sup>d</sup>Condensed Matter Theory Group, Department of Physics and Astronomy, Uppsala University, Uppsala, SE-75120, Sweden

#### Materials used

All the chemicals and reagents used in this study are of analytical grade and used without further purification. Cobaltous chloride (CoCl<sub>2</sub>.6H<sub>2</sub>O, 99%, extra pure) was purchased from SDFCL and sodium borohydride (NaBH<sub>4</sub>, anhydrous) was purchased from Sigma-Aldrich. Hydrochloric acid (HCl, 37%) was bought from Merck. Other chemicals including ammonium chloride (NH<sub>4</sub>Cl, 99%), salicylic acid (C<sub>7</sub>H<sub>6</sub>O<sub>3</sub>, 99.5%), sodium nitroprusside (C<sub>5</sub>FeN<sub>6</sub>Na<sub>2</sub>O, 99%), para-dimethylaminobenzaldehyde (p-C<sub>9</sub>H<sub>11</sub>NO, 99%), sodium nitrate (NaNO<sub>3</sub>, 99%), sodium nitrite (NaNO<sub>2</sub>, 98%), sulphanilamide (C<sub>6</sub>H<sub>8</sub>N<sub>2</sub>O<sub>2</sub>S, 99%), N-(1-Naphthyl) ethylenediamine dihydrochloride (C<sub>12</sub>H<sub>14</sub>N<sub>2</sub>, 99%), trisodium citrate (Na<sub>3</sub>C<sub>6</sub>H<sub>5</sub>O<sub>7</sub>) were bought from Loba Chemie. Reagents including sodium sulphate (Na<sub>2</sub>SO<sub>4</sub>, 99%) and potassium hydroxide (KOH, 85%), sodium hydroxide (NaOH, 98%), hydrazine monohydrate (N<sub>2</sub>H<sub>4</sub>.H<sub>2</sub>O, 99%), sodium hypochlorite solution (NaClO, 4-6%) and hydrogen peroxide solution (H<sub>2</sub>O<sub>2</sub>, 5%) were also purchased from Loba Chemie. High purity <sup>14</sup>N<sub>2</sub> (99.999%), <sup>15</sup>N<sub>2</sub> (99%) and Ar gas (99.999%) cylinders were purchased from Sigma. All solutions were prepared using deionized water obtained from Millipore system (>15 MΩ).

#### Experimental Section

##### Catalyst synthesis

The Co<sub>2</sub>B (1:8) catalyst was synthesized thru environment friendly sonochemical technique using non-expensive precursors. Briefly, 1 mmol of CoCl<sub>2</sub>.6H<sub>2</sub>O (476 mg) was added in a round bottom flask (RBF) and dissolved in 40 mL of deionized water (Solution A). The solution in RBF was kept under inert atmosphere and ultrasonication for 10 minutes using a bath sonicator filled with ice cold water. Further, 8 mmol of NaBH<sub>4</sub> solution (302 mg in 10 mL deionized

water) *i.e.* solution B as reducing agent, was added dropwise into solution A under continuous bath sonication and probe sonication at regular intervals (15 second sonication and 30 second rest) using ultrasonic horn at a frequency of 20 Hz subsequently. After the complete addition of solution B into solution A, the reaction mixture was kept undisturbed for reaction completion (confirmed from disappearance of bubble evolution).

Reactions taking place during the synthesis are mentioned as follows:

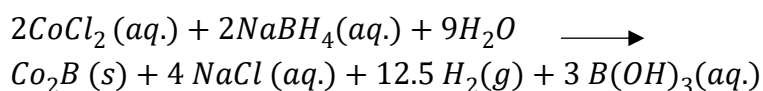

In the end, the precipitates formed were collected via centrifugation and washed 3-4 times by mixture of ethanol: water (1:1, v/v) and kept for drying overnight at 60 °C under vacuum to obtain precipitates, denoted as Co<sub>2</sub>B (Metal : Boron). The Metal: Boron ratio was varied as 1:4/1:8/1:12 mmol in this study.

### ***Electrochemical analysis for NRR/ORR/OER***

All the electrochemical experiments for ORR and OER were performed in a single compartment electrochemical cell. The electrochemical studies for NRR were performed at room temperature in a home made two compartment H-cell, separated by a Nafion N117 membrane. Before fitting the membrane, it was boiled in deionized water (>15 MΩ) for 30 min., followed by heat treatment at 80 °C in H<sub>2</sub>O<sub>2</sub> (5%) solution for another 30 min., after which it was finally boiled in 0.05 M H<sub>2</sub>SO<sub>4</sub> for 1 h. The experiments were performed with three electrode assembly consisting of working electrode (WE), a home-made double junction Ag/AgCl/3M KCl as reference electrode (RE) and Pt wire as counter electrode (CE) in 0.1 M KOH electrolyte solution. A Teflon-embedded glassy carbon (GCE Ø 5mm, Pine instrument, USA) disk electrode with Pt ring was used as a working electrode for RRDE analysis and glassy carbon (Ø 2mm) electrode was utilised for the rest of the electrochemical analysis *viz.*, CV, EIS, ECSA, etc. Catalyst was physically grinded in mortar pestle for 30 min. to obtain fine powder. To prepare the catalyst ink, catalyst powder was taken (all the variants; 1.5 mg) and dispersed in the mixture of isopropyl alcohol (20 µL) and deionized water (480 µL) and further ultrasonicated to get homogeneously dispersed catalyst ink. Afterwards, the ink was drop-casted on GC electrode surface and dried at room temperature under atmospheric conditions. Before coating the catalyst ink onto the GCE, it was polished on a Nylon polishing cloth (SM 407052, AKPOLISH) using alumina paste of different grades (0.5, 0.3, 0.05 µm; Pine instrument, USA) to acquire mirror finishing followed by thorough washing and ultrasonication in deionized water to remove any physisorbed alumina particles over its surface. RRDE experiments were performed using Autolab 302N modular potentiostat/galvanostat analysed by NOVA 1.11 software. The hydrodynamic experiments were carried out at different rotation rates using a speed controlling unit (AFMSRC, Pine research instrument Inc., USA). Other measurements including linear sweep voltammetry

(LSV), chronoamperometry, electrochemical impedance spectroscopy (EIS) and cyclic voltammetry (CV) were performed using Biologic VSP 300 Potentiostat.

### ***Zn-air battery***

A home-made battery cell was utilized to assess the performance of catalyst as an air cathode. Air cathode consist of catalyst layer (CL), nickel foam and gas diffusion layer (GDL) respectively. CL was fabricated using Co<sub>2</sub>B as catalyst in N-Methyl-2-pyrrolidone (NMP) solvent. Mixture of polyvinylidene fluoride (PVDF) and vulcan carbon (VC) (1:1, ratio by weight) was dispersed in NMP after grinding to a fine powder using ultrasonication for 30 min. in bath sonicator and slurry was coated onto the Ni foam substrate as GDL. On other side of Ni foam substrate, catalyst layer was coated followed by drying and pressing under the pressure of 2.5 MPa. Finally, Zn-air battery was assembled with polished Zn foil (99.5%, extra pure) as the anode, 6 M KOH and 0.2 M Zn(ac)<sub>2</sub> as the electrolyte and prepared air cathode (geometric area of 0.1256 cm<sup>2</sup>, catalyst loading of 2 mg cm<sup>-2</sup>) in home-made cell setup. For a better comparison, Zn-air battery was assembled using mixture of commercial Pt/C (20%) and RuO<sub>2</sub> (1:1 ratio by weight) as catalyst layer. All measurements were carried out under ambient conditions of temperature and pressure using Biologic VSP-300 potentiostat. Linear sweep voltammetry was employed to obtain the polarization curves at a scan rate of 5 mV s<sup>-1</sup>. The galvanostatic charge-discharge cycling (10 min. discharge and 10 min. charge at ± 10 mA cm<sup>-2</sup> respectively) were performed for 25 h. Both the current density and power density were normalized to the effective surface area of air cathode.

### ***Battery powered NH<sub>3</sub> production***

The rechargeable Zn-air battery equipped with Co<sub>2</sub>B (1:8) as air cathode was used to conduct NRR measurements. We have built a homemade two-electrode NRR setup wherein two batteries connected in series (2.9 V) were used as the power supply and a 300 Ω resistor was used as voltage divider. Quantification of ammonia produced during electrolysis was measured using similar set of experiments previously in experimental section.

### ***Physical characterization***

The P-XRD patterns for catalysts were investigated with PANalytical X'PERT pro diffractometer in the 2θ range of 5-80° using Cu-Kα radiation (λ=0.1542 nm, 40kV, 40mA) with a scan speed of 2° per minute and a proportional counter detector to acquire structural information. The morphological analysis was done using field emission-scanning electron microscopy (FE-SEM, Hitachi, Japan, SU8010) and transmission electron microscopy (HR-TEM, JEOL, Jem 2100 plus). The high resolution TEM (HR-TEM) images were recorded at 200 kV. To attain the electronic attributes of catalyst, XPS measurements were performed with the Thermo scientific NEXSA surface analysis with a micro-focused (400 μm, 72 W, 12000 V) monochromatic Al Kα (1486.6 eV) a hemispherical analyser and 128 channel plate detectors under ultrahigh vacuum (UHV 8-10 mbar). The obtained spectra were calibrated with C 1s spectra. Quantification of various impurities and products formed during NRR were tested using an (SEC2000-DH) UV-vis

Spectrometer. Water contact angle (WCA) measurements were performed using a First Ten Angstroms (FTA) Contact Angle System by sessile water drop method under room temperature conditions by using water as a probe liquid with a volume of 0.6  $\mu\text{L}$  in a needle with width of 0.305 mm. The average WCA ( $\theta_{\text{H}_2\text{O}}$ ) was then determined for the different samples. The surface hydrophobicity properties of all catalyst variants were studied by WCA measurements. Homogeneous suspension of catalyst (1 mg) mixed with water (20  $\mu\text{L}$ ) was drop-casted onto the Teflon tape rolled over glass slide followed by drying at room temperature. After which the water drops were deposited with the help of sessile water syringe.

## **Quantification of products/contaminants**

### ***Quantification of $\text{NH}_3$ by Indophenol blue method<sup>1</sup>***

The final product (*i.e.*  $\text{NH}_3$ ) obtained after electrolysis was quantified using indophenol blue method with the help of SEC2000 spectrometer system. Firstly, 2 mL of electrolyte sample (after 2 h chronoamperometry) was collected from the cathodic compartment of H-cell in which 2 mL of solution containing mixture of 5% salicylic acid and 5% trisodium citrate in 1 M KOH was added immediately. Consequently, 1 mL of 0.05 M NaClO and 200  $\mu\text{L}$  of 1% sodium nitroprusside as a colouring agent was added thereafter to the same electrolyte sample. The solution was incubated for 2 h to develop stable colour, and absorbance was measured at a wavelength of 655 nm using UV-vis spectroscopy. Initially, the UV-vis spectrum were obtained for different concentrations of  $\text{NH}_3$  (0.2, 0.4, 0.8, and 1 ppm) using standard  $\text{NH}_4\text{Cl}$  solution, which was further utilised to obtain a calibration curve exhibiting a linear relationship between absorbance and concentration value from the fitting curve ( $y = 0.285x + 0.109$ ,  $R^2 = 0.99663$ ). Afterwards, the amount of  $\text{NH}_3$  in electrolyte samples collected after NRR was quantified using standard calibration curve.

### ***Quantification of $\text{N}_2\text{H}_4$ by Watt-Chrisp method<sup>1</sup>***

Presence of  $\text{N}_2\text{H}_4$  in the electrolyte sample after NRR was confirmed using Watt and Chrisp method. Briefly, 0.3 g of p- $\text{C}_9\text{H}_{11}\text{NO}$  was mixed with 2 mL of HCl and 20 mL of ethanol to obtain the final colouring solution. A series of standard solutions of  $\text{N}_2\text{H}_4$  (0.1, 0.2, 0.4, 0.8, and 1 ppm) were prepared and 2 mL of which was separately mixed with 2 mL of above prepared colouring solution. Afterwards, the solution was kept under incubation for 20 min. at R.T. to achieve stable color and measure absorbance at 455 nm using UV-vis spectrometer. The as-obtained calibration curve ( $y = 0.285x + 0.109$ ,  $R^2 = 0.99663$ ), exhibit a good linear relationship between absorbance and  $\text{N}_2\text{H}_4$  concentrations respectively. The determination of amount of hydrazine formed in electrolyte sample after NRR was estimated similarly using the standard calibration curve.

### ***Quantification of NH<sub>3</sub> by Nessler's reagent method <sup>2</sup>***

The quantified NH<sub>3</sub> yield was validated by other quantification method *i.e.* Nessler's reagent test. The preparation of Nessler's reagent was initiated by the addition of 2.5 g of mercuric iodide into 5 mL aq. solution of potassium iodide (2 g in 5 mL deionized water) followed by its dilution upto 20 mL using deionized water. To the above solution, 4 g of NaOH was added thereafter, denoted herein as Nessler's reagent. For quantification of produced ammonia, 5 mL of electrolyte solution obtained after electrolysis was collected to which 0.25 mL of sodium potassium tartrate (500 g L<sup>-1</sup>) and 0.25 mL of Nessler's reagent was added. The above solution mixture was kept undisturbed for 10 minutes and then measurement was performed using UV-Vis. spectrophotometer at a wavelength ( $\lambda$ ) of 420 nm. The calibration curve was extracted from the different standard NH<sub>4</sub>Cl solutions with known NH<sub>4</sub><sup>+</sup> concentrations in the range of 0.1, 0.2, 0.4, 0.8, and 1.0  $\mu\text{g mL}^{-1}$  in a similar way.

### ***Isotope labelling experiments <sup>3</sup>***

The isotope labelling experiment was performed by taking <sup>15</sup>N<sub>2</sub> (Sigma-Aldrich 99 atom% <sup>15</sup>N) as the feeding gas during NRR for possible <sup>15</sup>NH<sub>4</sub><sup>+</sup> production. A fixed amount of gas (200 mL) was supplied to the NRR cell during the electrolysis for 2 h. After electrolysis 25 mL of the electrolyte was taken out and mixed with 1M HCl and then concentrated to 1 mL, from which 0.6 mL of the resulting liquid was taken and 0.4 mL of DMSO-d<sub>6</sub> was added as an internal standard. The produced ammonia was confirmed by using <sup>1</sup>H nuclear magnetic resonance measurements (<sup>1</sup>H NMR) with water gate suppression sequence with a relaxation delay of 3 s, 8000 scans using a pulse sequence by pulse field gradient (PFG) unit. All other samples (<sup>14</sup>N<sub>2</sub> and Ar saturated) were tested in the similar manner.

### ***Purification of gas-supplies***

Prior to each NRR measurement, the <sup>15</sup>N<sub>2</sub> gas was passed through alkaline KMnO<sub>4</sub> followed by dilute H<sub>2</sub>SO<sub>4</sub> solution (scrubbing solution) to remove any trace NH<sub>4</sub><sup>+</sup> and NO<sub>x</sub> (NO, NO<sub>2</sub>, N<sub>2</sub>O) impurities. The impurities were quantified using colorimetric method and gas chromatography-mass spectroscopy (GC-MS) method by following the reported procedures. The NO<sub>x</sub> (NO/NO<sub>2</sub>) was trapped in alkaline KMnO<sub>4</sub> solution technique while NH<sub>4</sub><sup>+</sup> impurities were trapped in acidic solution and both were quantified using UV-Vis. spectrophotometry before and after purification. On the other hand, the N<sub>2</sub>O impurities were detected and quantified by means of GC-MS in SIM (selected ion monitoring) mode at m/z value of 44 for N<sub>2</sub>O. For N<sub>2</sub>O detection in GC-MS via SIM acquisition mode, the column oven temperature was set at 40 °C with an injection temperature of 150 °C, column flow of 0.99 mL min<sup>-1</sup>, ion source temperature of 200 °C, interface temperature of 220 °C.

### ***Detection of NO<sub>2</sub><sup>-</sup> and NO<sub>3</sub><sup>-</sup> contaminants in electrolyte<sup>4</sup>***

Amount of NO<sub>3</sub><sup>-</sup> present in the electrolyte *i.e.* 0.1 M KOH was determined using UV-Vis. spectrophotometry, wherein the peak at 220 nm of wavelength corresponds to absorption of nitrates and the corresponding amount can be quantified with respect to measured absorbance value. Standard stock solutions with varying concentrations *i.e.* 0.2 ppm to 5 ppm

were prepared using  $\text{NaNO}_3$  stock solution. Afterwards, 5 mL of standard along with sample solution were taken in glass vial to which 0.1 mL of 1 M HCl was added subsequently with frequent shaking. The solution was allowed to stand undisturbed for 5 min. and UV-vis. measurement was carried out in the range of 200-300 nm to obtain the analogous calibration curve.

On the other hand, diazotization reaction can be carried out for quantification of nitrites using sulphanilamide under acidic environment followed by coupling with N-(1-Naphthyl) ethylenediamine dihydrochloride, resulting into pink azo dyes exhibiting peak at 540 nm respectively. For quantification of  $\text{NO}_2^-$ , standard solutions were prepared using  $\text{NaNO}_2$  stock solution with different concentrations *i.e.* 2 to 60  $\mu\text{g L}^{-1}$ . Two reagents were prepared separately; 0.5 g of sulphanilamide in 50 mL of 2 M HCl *i.e.* **A** and 20 mg of N-(1-Naphthyl) ethylenediamine dihydrochloride in 20 mL of deionized  $\text{H}_2\text{O}$  *i.e.* **B**. At first, 5 mL of standard or sample solutions were taken in glass vials, to which 0.1 mL of A was added and allowed to stand for 10 min, followed by addition of 0.1 mL of B respectively. After mild shaking, the solution mixture was kept undisturbed for 30 min and amount of  $\text{NO}_2^-$  was estimated under wavelength range of 440-600 nm, from which calibration curves were extracted and plotted.

## Electrochemical measurements

### ***Electrochemical impedance spectroscopic (EIS) measurements***

Calculation of charge transfer resistance was done to study the kinetics of the electrocatalysts at electrode/electrolyte interface by performing electrochemical impedance spectroscopy (EIS). A DC potential of -0.3 V vs. RHE (formal potential obtained after performing CV in  $\text{N}_2$  saturated 0.1 M KOH) was applied over an AC perturbation of 10 mV between a frequency range of 100 Hz to 40 KHz in a logarithmic frequency step over a single sine wave. A typical semicircular behavior was observed in corresponding Nyquist plot from which solution resistance ( $R_s$ ) was obtained at high-frequency region, polarization resistance ( $R_p$ ) was obtained at low-frequency region, wherein the difference between the two gave charge transfer resistance ( $R_{ct}$ ) respectively.

### ***Pseudo-double layer capacitance calculation ( $C_{dl}$ )***

In order to determine the double layer capacitance of electrocatalysts, cyclic voltammetry was performed at different scan rates (10  $\text{mV s}^{-1}$  to 320  $\text{mV s}^{-1}$ ) under the non-faradaic region between a potential window of 1 to 1.1 V vs. RHE in  $\text{N}_2$  saturated 0.1 M KOH solution. The average current density obtained from CVs were plotted against scan rate, wherein, the value of slope provided the double-layer pseudo-capacitance. ECSA was further calculated by dividing  $C_{dl}$  by specific capacitance of flat standard surface *i.e.* taken as 40  $\mu\text{Fcm}^{-2}$  in this case.<sup>5</sup>

## Calculations

The rate of ammonia formation was determined according to

$$\text{Yield rate}(\mu\text{g cm}^{-2} \text{h}^{-1}) = \frac{V \times C_{\text{NH}_3}}{t \times m_{\text{cat.}}}$$

Here,  $C_{\text{NH}_3}$  is the measured  $\text{NH}_3$  concentration,  $V$  the volume of electrolyte,  $t$  the time of the reduction reaction and  $m_{\text{cat}}$  is the mass of the catalyst loaded onto GCE. Similarly, its Faradaic efficiency (F.E.) was calculated as

$$\text{F.E. (\%)} = \frac{3 \times F \times V \times C_{\text{NH}_3}}{17 \times Q}$$

Where  $F$  is the Faraday constant and  $Q$  is the total amount of charge passed through the electrodes during the electrolysis.

Calculations for specific capacity were done using the following equation:

$$\text{Specific capacity} = \frac{\text{current} \times \text{discharge time}}{\text{weight of consumed zinc}}$$

The energy density for the same were calculated according to following equation:

$$\text{Energy density} = \frac{\text{current} \times \text{discharge time} \times \text{average discharge voltage}}{\text{weight of consumed zinc}}$$

$\text{TOF}_{\text{NRR}}$  calculations for  $\text{Co}_2\text{B}$  (1:8) catalyst;

$$\text{Turnover frequency (TOF)} = \frac{\text{Turnover number (TON)}}{\text{Time (h)}}$$

$$\text{Turnover number (TON)} = \frac{\text{yield of } \text{NH}_3 \text{ obtained after NRR (mg)}}{\text{Loading of catalyst (mg)}}$$

Where, time ( $t$  in hours) represents the total NRR electrolysis duration.

TON and TOF for the catalyst ( $\text{Co}_2\text{B}$  (1:8)) is calculated as follows:

$$\text{TON} = \frac{2.98022}{0.02983} = 1.49011; \text{TOF} = \frac{1.49011}{2} = 0.74 \text{ h}^{-1}$$

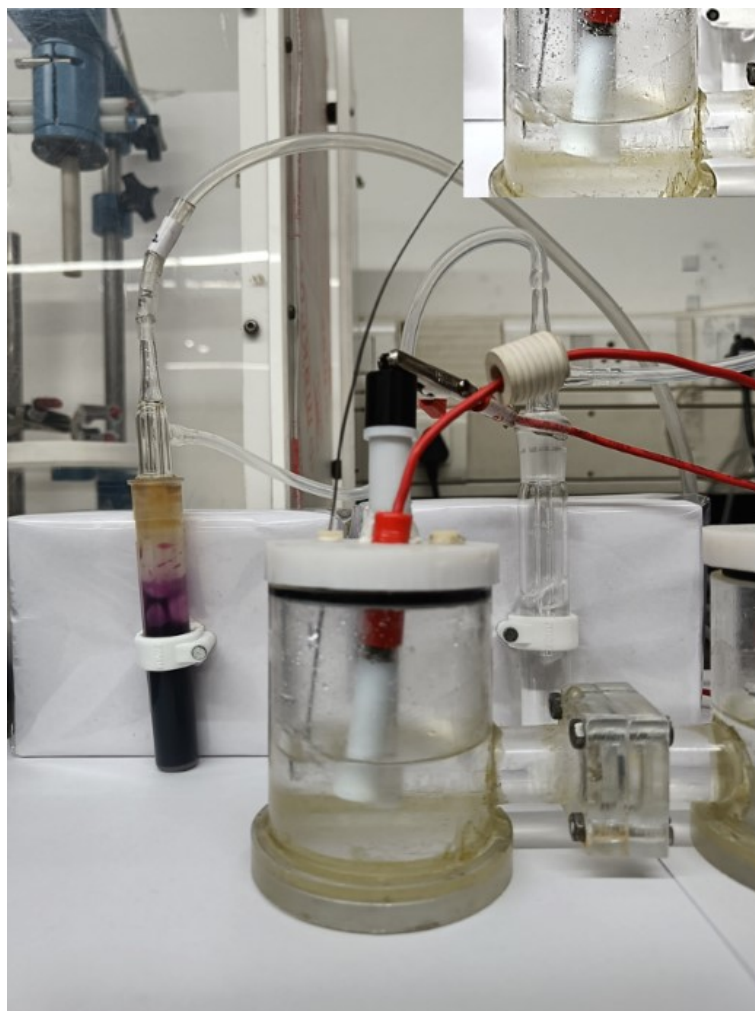

**Fig. S1** Photograph of H-cell setup acquired for NRR with gas-streams passing through  $\text{KMnO}_4$  and acid trap before starting the measurements.

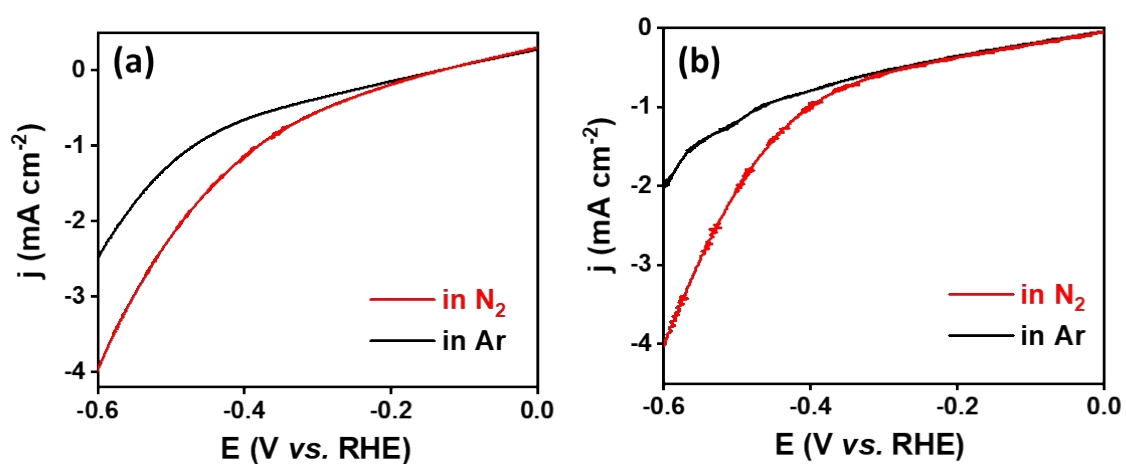

**Fig. S2** Linear sweep voltammograms in Ar- and  $\text{N}_2$ - saturated 0.1 M KOH by (a)  $\text{Co}_2\text{B}$  (1:4) and (b)  $\text{Co}_2\text{B}$  (1:12) during NRR.



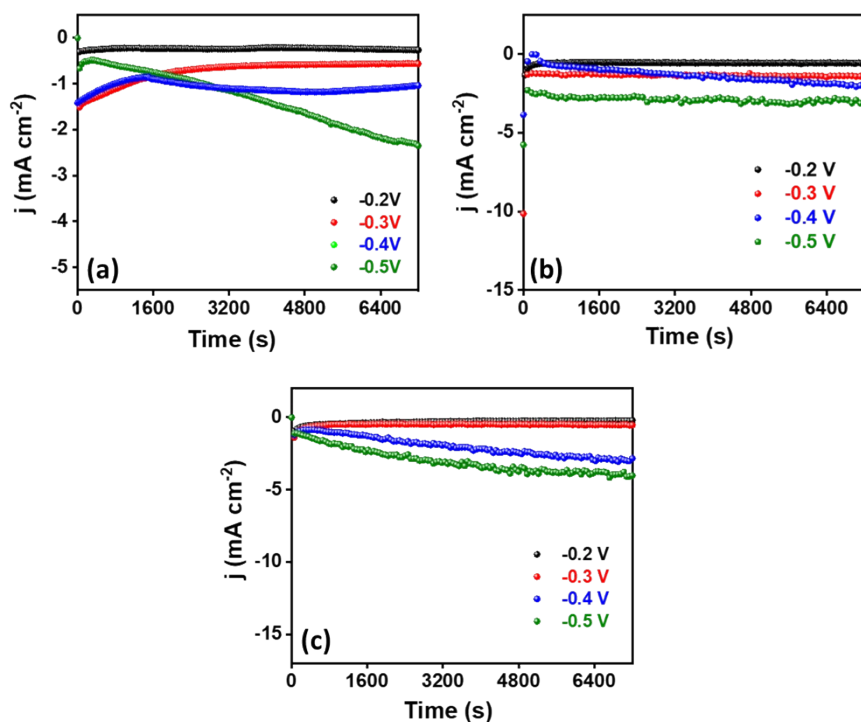

**Fig. S3** Chronoamperometric curves recorded at different potentials for (a) Co<sub>2</sub>B (1:4), (b) Co<sub>2</sub>B (1:8) and (c) Co<sub>2</sub>B (1:12) during NRR.

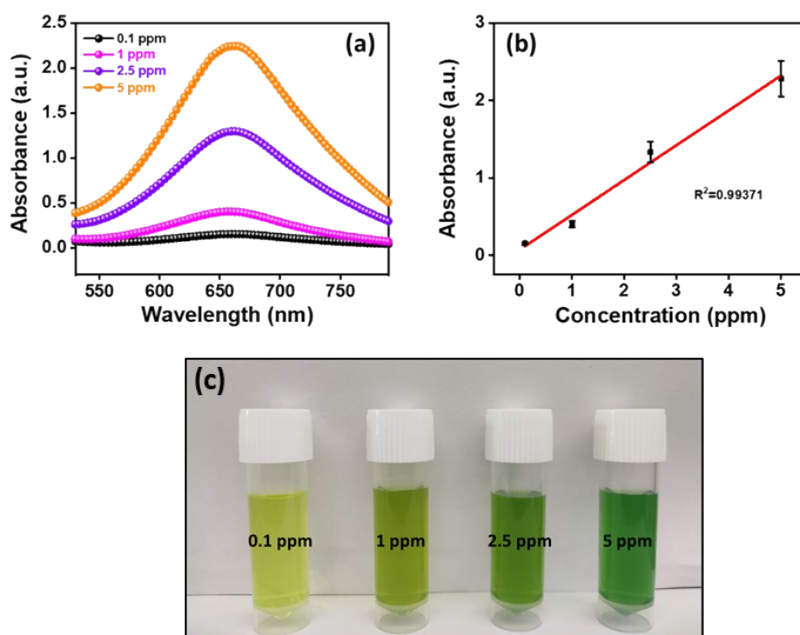

**Fig. S4** (a) UV-Vis. Absorbencies for standard NH<sub>3</sub> solutions, (b) respective calibration curve by Indophenol blue method and (c) Photographs of standard NH<sub>3</sub> solutions with different concentrations captured during Indophenol blue method.

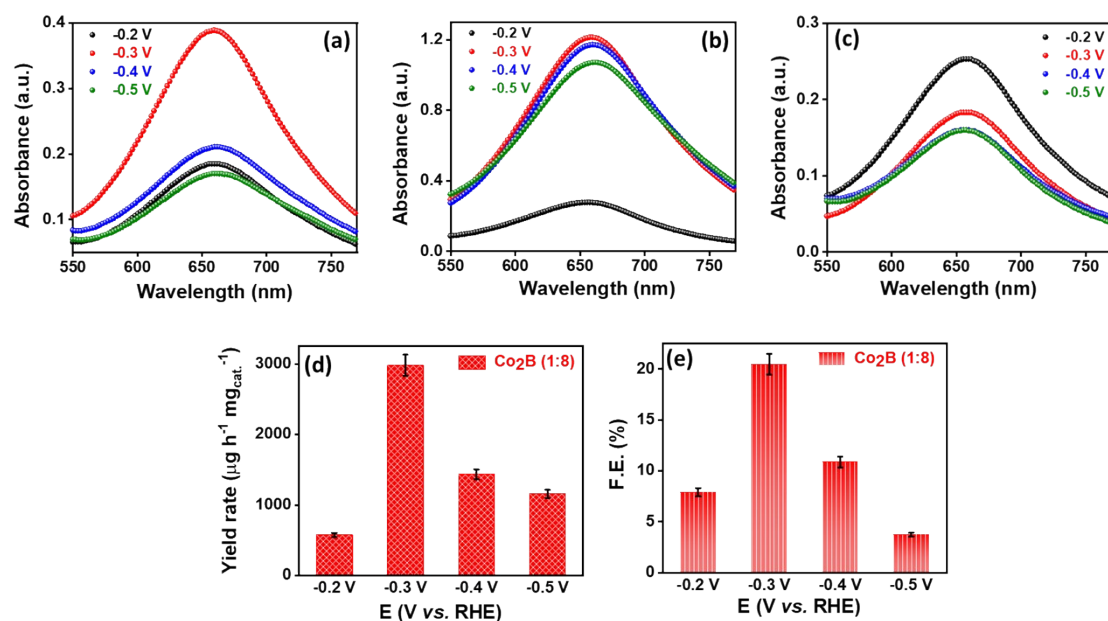

**Fig. S5A** UV-Vis. Absorbencies for (a) Co<sub>2</sub>B (1:4), (b) Co<sub>2</sub>B (1:8) and (c) Co<sub>2</sub>B (1:12) after NRR at different potentials. (d) F.E. and (e) NH<sub>3</sub> production yield rates for Co<sub>2</sub>B (1:8) at different applied potentials.

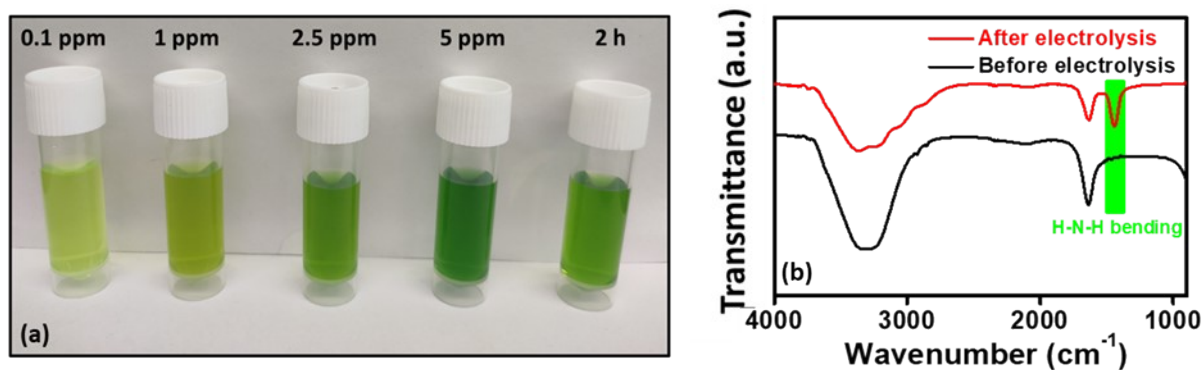

**Fig. S5B** (a) Image of electrolyte sample collected after 2h of chronoamperometry at -0.3 V (vs. RHE) by Co<sub>2</sub>B (1:8) with standard NH<sub>4</sub><sup>+</sup> samples, (b) FT-IR spectra comparison of 0.1 M KOH and sample+0.1 M KOH solution obtained after NRR by Co<sub>2</sub>B (1:8).

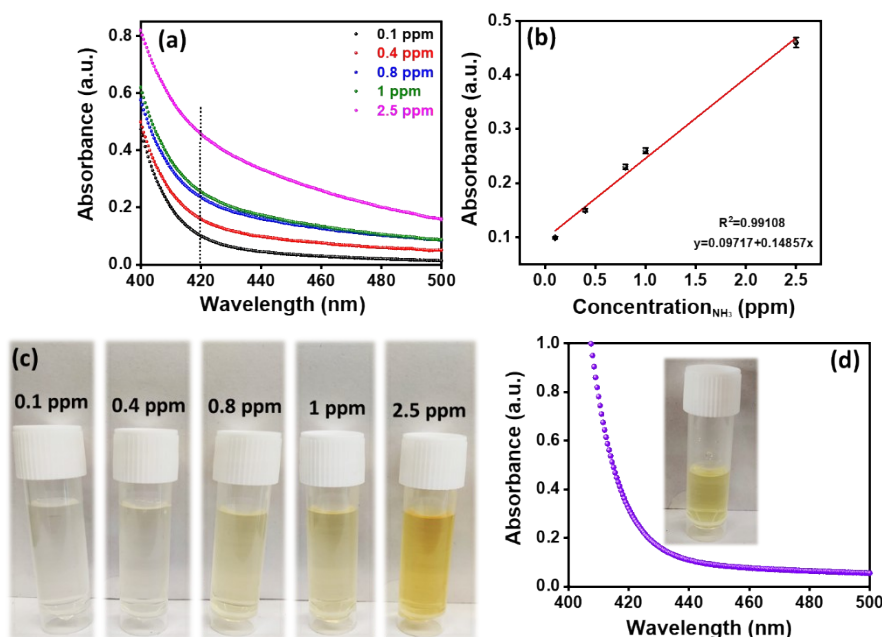

**Fig. S5C** UV-Vis. curves obtained for standard  $\text{NH}_4^+$  solutions (different concentrations) after Nessler's reagent test and (b) corresponding calibration curve for quantification. (c) Photographs of color development of standard  $\text{NH}_4^+$  solutions during Nessler's test. (d) UV-Vis. absorbance curve for solution collected after 2 h electrolysis by  $\text{Co}_2\text{B}$  (1:8) in  $\text{N}_2$ -saturated 0.1 M KOH during Nessler's test.

**Fig. S6** Quantification of  $\text{N}_2\text{H}_4$  by Watt-Chrisp method by (a) standard  $\text{N}_2\text{H}_4$  solutions at

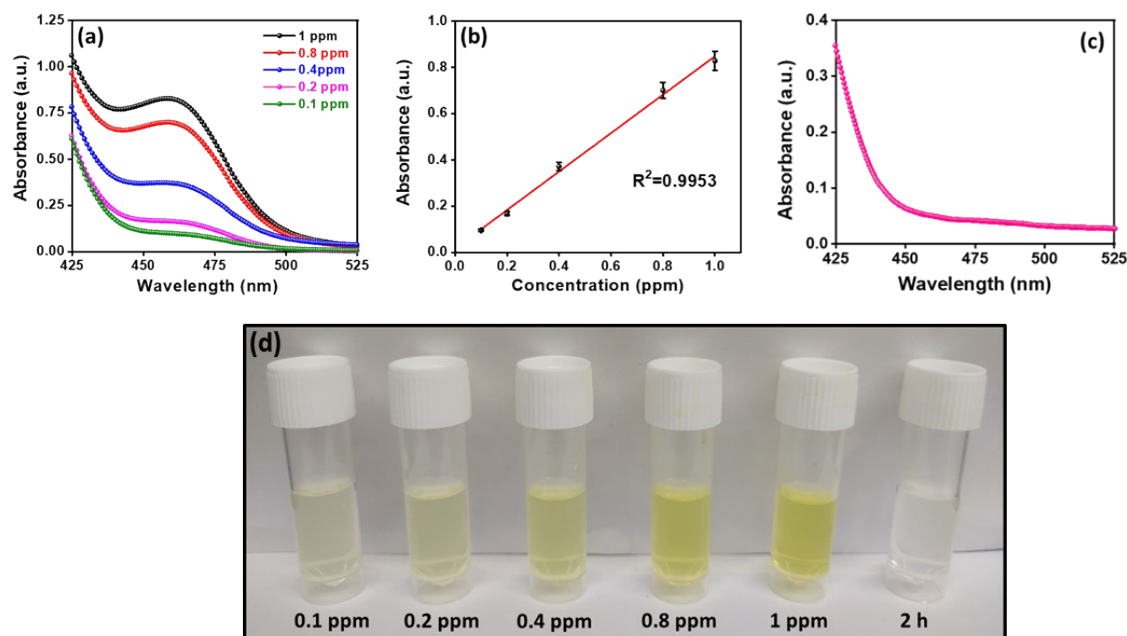

different concentrations and (b) respective calibration curve extracted from (a) and (d) Photographs of standard  $\text{N}_2\text{H}_4$  solutions of different concentrations and electrolyte sample collected after NRR by  $\text{Co}_2\text{B}$  (1:8) at -0.3 V during quantification by Watt-Chrisp method.

**Table S1A.** Comparison of activity of recent reported catalysts towards NRR in alkaline media

| Catalyst                                           | Electrolyte | $R_{\text{NH}_3}$<br>( $\mu\text{g h}^{-1} \text{mg}_{\text{cat.}}^{-1}$ ) | Pot.<br>vs. RHE | F.E. (%)  | Ref. |
|----------------------------------------------------|-------------|----------------------------------------------------------------------------|-----------------|-----------|------|
| MIL-100 (Al)/Cu                                    | 0.1 M KOH   | $10.6 \mu\text{g h}^{-1} \text{cm}^{-2}$<br>$\text{mg}_{\text{cat.}}^{-1}$ | 0 V             | 22.6      | 6    |
| Co <sub>3</sub> Fe-MOF                             | 0.1 M KOH   | 8.79                                                                       | -0.2 V          | 25.64     | 7    |
| 3D Rh particles                                    | 0.1 M KOH   | 35.58                                                                      | -0.2 V          | 1.2 (0 V) | 8    |
| Cu SAC                                             | 0.1 M KOH   | 53.3                                                                       | -0.35 V         | 13.8      | 9    |
| Cu/PI-300                                          | 0.1 M KOH   | $12.4 \mu\text{g h}^{-1} \text{cm}^{-2}$                                   | -0.3 V          | 6.56      | 10   |
| FeSA-N-C                                           | 0.1 M KOH   | $7.48 \mu\text{g h}^{-1} \text{cm}^{-2}$                                   | 0 V             | 56.55     | 11   |
| C-ZIF-1100-1 h                                     | 0.1 M KOH   | $9.22 \text{mmol g}^{-1} \text{h}^{-1}$                                    | -0.3 V          | 10.2      | 12   |
| SA-Mo/NPC                                          | 0.1 M KOH   | $34.0 \text{g h}^{-1} \text{mg}_{\text{cat}}^{-1}$                         | -0.45 V         | 14.6      | 13   |
| PdRu TPs                                           | 0.1 M KOH   | 37.23                                                                      | -0.2 V          | 1.85      | 14   |
| Pd <sub>3</sub> Cu <sub>1</sub>                    | 0.1 M KOH   | 39.9                                                                       | -0.25 V         | 0.58      | 15   |
| Rh NNs                                             | 0.1 M KOH   | 23.9                                                                       | -0.2 V          | 0.217     | 16   |
| Se-doped C                                         | 0.1 M KOH   | $1.14 \mu\text{g h}^{-1} \text{cm}^{-2}$                                   | -0.45V          | 3.92      | 17   |
| Te-doped C                                         | 0.1 M KOH   | $1.91 \mu\text{g h}^{-1} \text{cm}^{-2}$                                   | -0.5 V          | 4.6       | 17   |
| FeWS <sub>x</sub> @FeWO <sub>4</sub> -2            | 1 M KOH     | 16.6                                                                       | -0.45 V         | 6.01      | 18   |
| Ru@Ti <sub>3</sub> C <sub>2</sub> T <sub>x</sub>   | 0.1 M KOH   | 2.3<br>$\mu\text{mol h}^{-1} \text{cm}^{-2}$                               | -0.4 V          | 13.13     | 19   |
| Cu@Ti <sub>3</sub> C <sub>2</sub> T <sub>x</sub>   | 0.1 M KOH   | 3.04<br>$\mu\text{mol h}^{-1} \text{cm}^{-2}$                              | -0.5 V          | 7.31      | 20   |
| CuAg@Ti <sub>3</sub> C <sub>2</sub> T <sub>x</sub> | 0.1 M KOH   | 4.12<br>$\mu\text{mol cm}^{-2} \text{h}^{-1}$                              | -0.5 V          | 9.77      | 21   |
| CoP hollow nanocage                                | 1 M KOH     | 10.78                                                                      | -0.4 V          | 7.36      | 22   |
| Fe <sub>3</sub> Mo <sub>3</sub> C                  | 1 M KOH     | $13.1 \mu\text{g cm}^{-2} \text{h}^{-1}$                                   | -0.5 V          | 0.26      | 23   |
| Au/C                                               | 0.1 M KOH   | $9.39 \times 10^{-11} \text{mol cm}^{-2} \text{s}^{-1}$                    | -0.3 V          | 0.25      | 24   |
| FL-Sb nanosheets                                   | 0.1 M KOH   | 133.1                                                                      | 0.05 V          | 11.6      | 25   |
| CoPi/NPCS                                          | 0.1 M KOH   | 20.5                                                                       | -0.2 V          | 7.07      | 26   |

|                                                 |                  |                                                         |                     |                 |                  |
|-------------------------------------------------|------------------|---------------------------------------------------------|---------------------|-----------------|------------------|
| CoPi/HSNPC                                      | 0.1M KOH         | 16.48                                                   | -0.2 V              | 4.46            | 27               |
| Cu <sub>1.81</sub> S                            | 0.1 M KOH        | 2.19 $\mu\text{mol h}^{-1} \text{cm}^{-2}$              | -0.1 V              | 14.1            | 28               |
| Co/C-900                                        | 0.1 M KOH        | 4.66 $\mu\text{mol h}^{-1} \text{cm}^{-2}$              | -0.3 V              | 11.53           | 29               |
| Co-doped FePS <sub>3</sub> nanosheets           | 0.1 M KOH        | 90.6                                                    | -0.4                | 3.38            | 30               |
| Co-doped porous g-C <sub>3</sub> N <sub>4</sub> | 0.1 M KOH        | 49.69                                                   | -0.1                | 32.20           | 31               |
| CoFe double hydroxide                           | KOH              | $0.1 \times 10^{-9} \text{ mol s}^{-1} \text{ cm}^{-2}$ | -1.1 V (vs. Hg/HgO) | 14.18           | 32               |
| Fe-S-C                                          | 0.1 M KOH        | $8.8 \pm 1.3 \mu\text{g h}^{-1} \text{mg}^{-1}$         | -0.1 V              | $6.1 \pm 0.9\%$ | 33               |
| MoO <sub>2+x</sub>                              | 0.1 M KOH        | $3.95 \mu\text{g mg}_{\text{cat}}^{-1} \text{h}^{-1}$   | -0.2 V              | 22.1            | 34               |
| <b>Co<sub>2</sub>B (1:8)</b>                    | <b>0.1 M KOH</b> | <b>2980.22</b>                                          | <b>-0.3 V</b>       | <b>20.45</b>    | <b>This work</b> |

**Table S1B.** Comparison of NH<sub>3</sub> yield obtained from IC, Nessler's reagent and Indophenol blue method.

| Method            | Yield rate ( $\mu\text{g h}^{-1} \text{mg}^{-1}_{\text{cat.}}$ ) |
|-------------------|------------------------------------------------------------------|
| Indophenol blue   | 2980.22                                                          |
| Nessler's reagent | 2346.63                                                          |

**Table S2A.** Calculations of different parameters extracted from EIS in Fig. 1c for Co<sub>2</sub>B (1:4/1:8/1:12) in N<sub>2</sub>-saturated 0.1 M KOH.

| Catalyst                 | $R_s$ ( $\Omega$ ) | $R_p$ ( $\Omega$ ) | $R_{ct}$ ( $\Omega$ ) |
|--------------------------|--------------------|--------------------|-----------------------|
| Co <sub>2</sub> B (1:4)  | 24.07              | 66.34              | 42.27                 |
| Co <sub>2</sub> B (1:8)  | 23.17              | 61.83              | 38.83                 |
| Co <sub>2</sub> B (1:12) | 25.16              | 69.97              | 44.81                 |

**Table S2B.** Values of  $C_{dl}$ , ECSA and roughness factor for catalysts in this study extracted from Fig. S6 respectively.

| Catalyst                 | $C_{dl}$ ( $\mu\text{F}$ ) | ECSA ( $\text{cm}^2$ ) | Roughness factor (a.u.) |
|--------------------------|----------------------------|------------------------|-------------------------|
| Co <sub>2</sub> B (1:4)  | 146                        | 3.65                   | 116.24                  |
| Co <sub>2</sub> B (1:8)  | 420                        | 10.5                   | 334.39                  |
| Co <sub>2</sub> B (1:12) | 121                        | 3.025                  | 96.33                   |

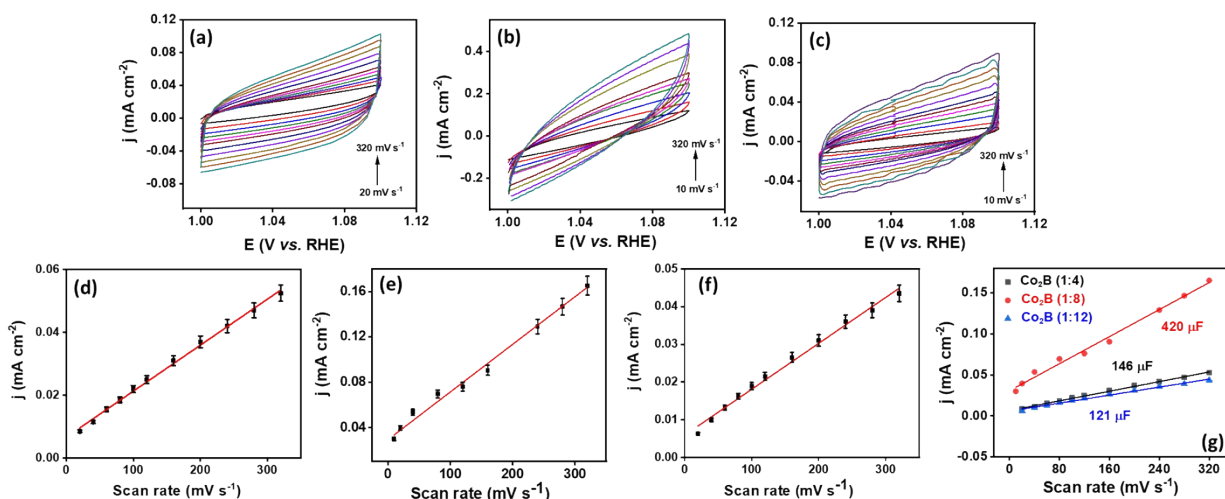

**Fig. S7** Cyclic voltammograms in non-faradaic region for (a) Co<sub>2</sub>B (1:4), (b) Co<sub>2</sub>B (1:8) and (c) Co<sub>2</sub>B (1:12) and simultaneous scan rate vs. current density plots (e)-(f) in N<sub>2</sub>-saturated 0.1 M KOH. (g) Scan rate vs. current density plots showing C<sub>dl</sub> values of Co<sub>2</sub>B catalysts.

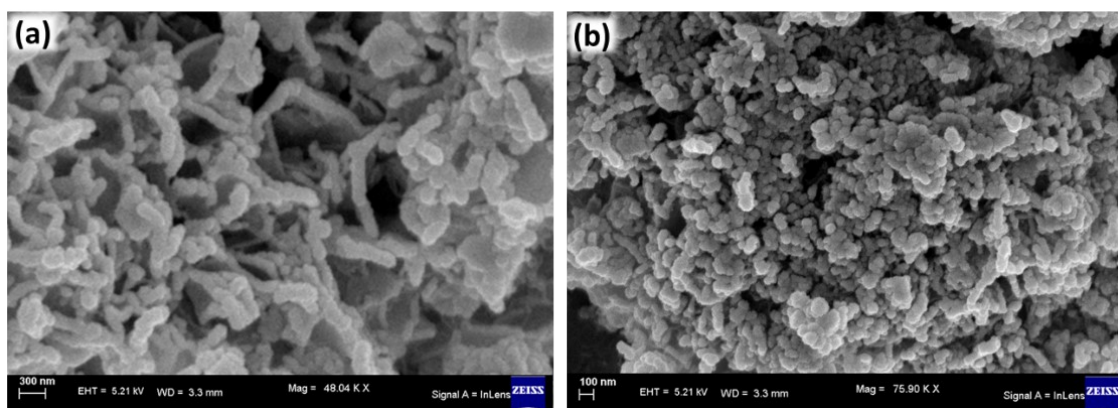

**Fig. S8A** FE-SEM images of (a) Co<sub>2</sub>B (1:4) and (b) Co<sub>2</sub>B (1:12) at different magnifications.

| S.No. | Catalyst                 | BET surface area (m <sup>2</sup> g <sup>-1</sup> ) |
|-------|--------------------------|----------------------------------------------------|
| 1.    | Co <sub>2</sub> B (1:4)  | 73.2                                               |
| 2.    | Co <sub>2</sub> B (1:8)  | 103                                                |
| 3.    | Co <sub>2</sub> B (1:12) | 34.1                                               |

Co<sub>2</sub>B catalysts.

**Table S2C.**  
BET calculations for

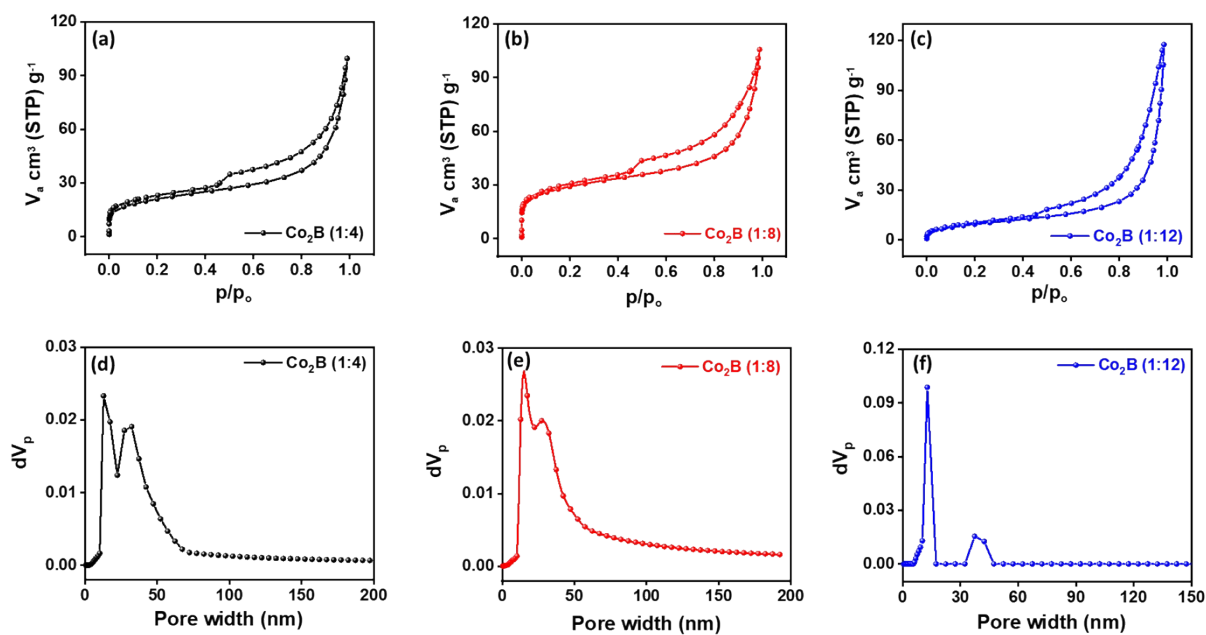

**Fig. S8B** (a)-(c) N<sub>2</sub> adsorption/desorption isotherms and (d)-(f) Pore size distribution for Co<sub>2</sub>B

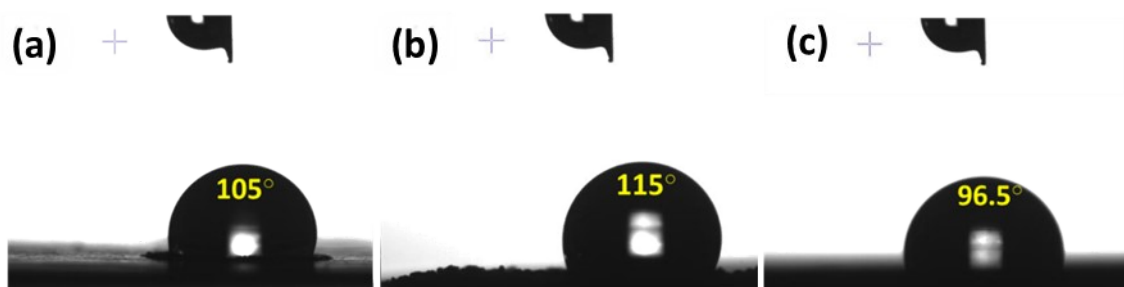

catalysts respectively.

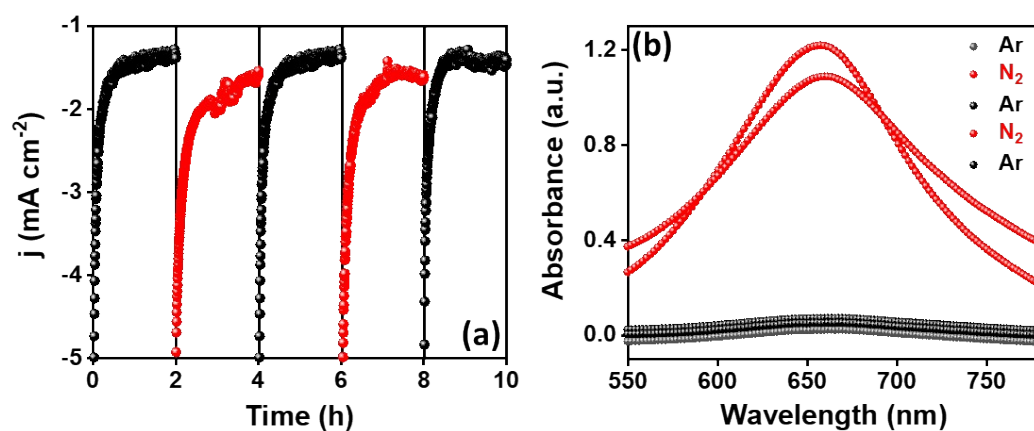

**Fig. S8C** Water contact angle images of (a) Co<sub>2</sub>B (1:4), (b) Co<sub>2</sub>B (1:8) and (c) Co<sub>2</sub>B (1:12) respectively.

**Fig. S9** (a) Chronoamperometric curves obtained for Co<sub>2</sub>B (1:8) at -0.3 V vs. RHE in switching gas feed environments and (b) respective absorbance values obtained after quantification by Indophenol blue method.



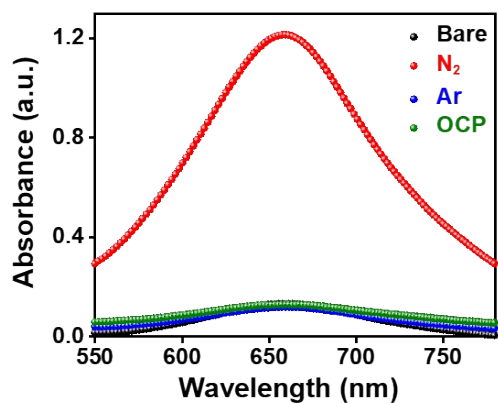

**Fig. S10** Absorbance values obtained for Co<sub>2</sub>B (1:8) after quantification during control experiments in Ar-saturated electrolyte, bare electrode and at open circuit potential.

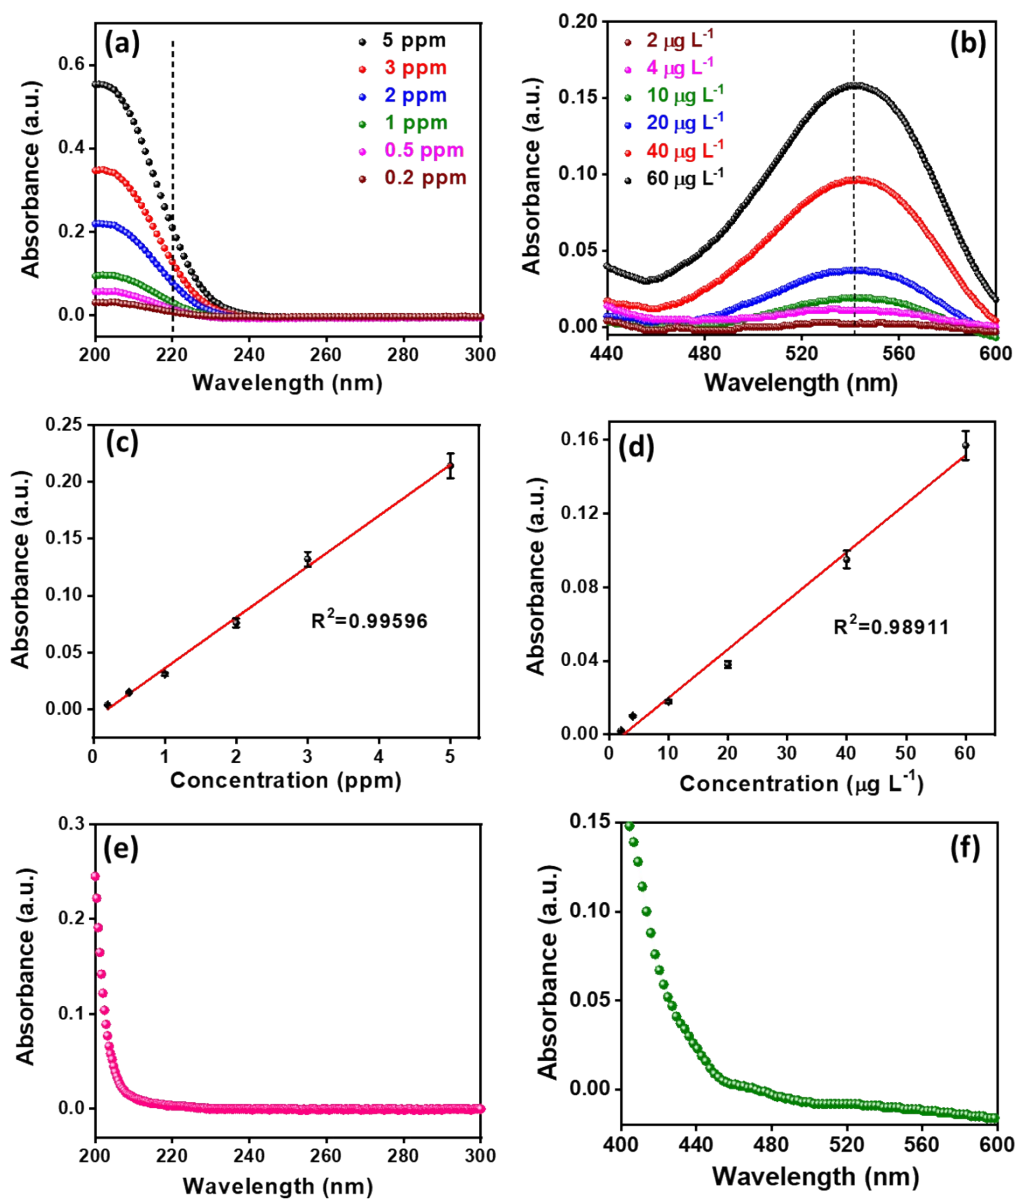

**Fig. S11** UV-Vis. absorbance curves for standard (a) nitrate and (b) nitrite solutions with different concentrations and (c)-(d) respective calibration curves obtained from the same. Quantification of (e) nitrate and (f) nitrite in Co<sub>2</sub>B (1:8) during NRR.

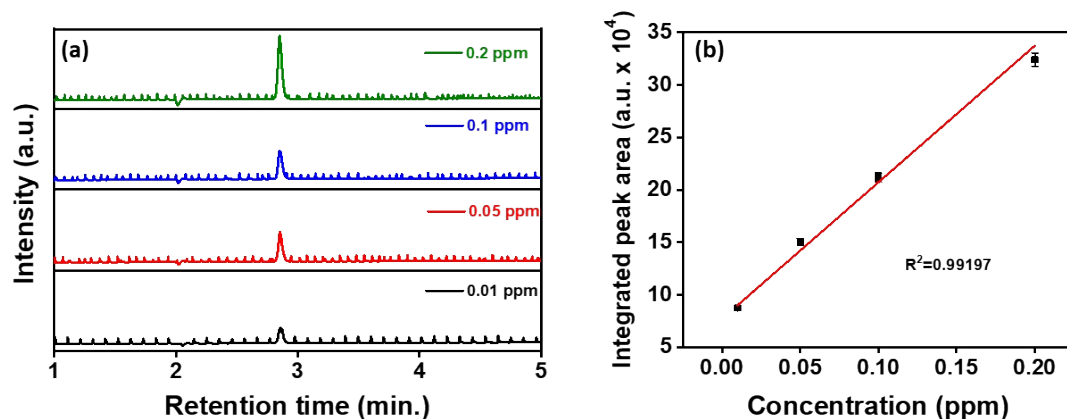

**Fig. S12A** Chromatogram for standard  $N_2O$  gas of different concentrations (0.01 ppm to 0.2 ppm) after analysis in SIM mode ( $m/z=44$ ) in GC-MS and (b) standard calibration curve extracted from the same for  $N_2O$  quantification.

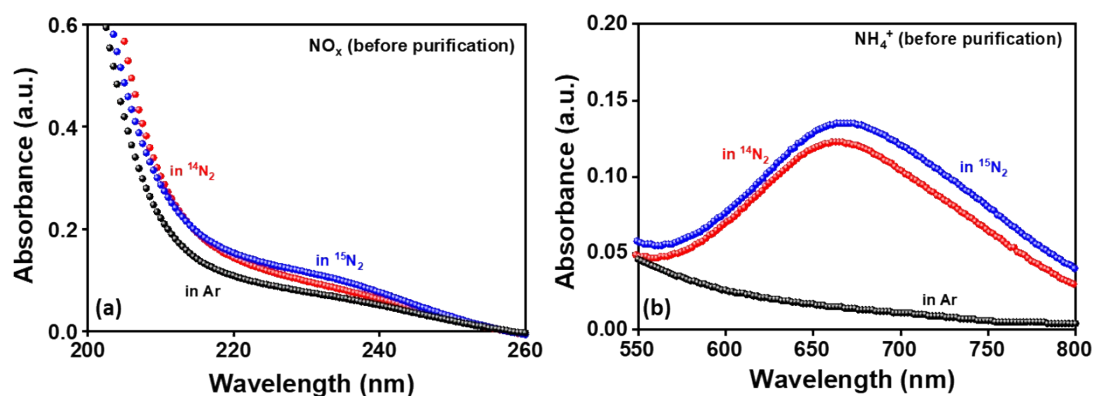

**Fig. S12B** UV-Vis. absorbance curves obtained before passing gas-supplies ( $Ar/^{14}N_2/^{15}N_2$ ) through the (a) alkaline  $KMnO_4$  solution to trap  $NO_x$  impurities and (B) acid trap to test  $NH_4^+$  impurities.

**Table S3.** Quantified amounts of  $NO_x/NH_4^+$  impurities before and after purification by scrubbing solution by colorimetric and GC-MS method.

| S.No. | Gas supply                | Before purification              |                |                                 | After purification               |                |                                 |
|-------|---------------------------|----------------------------------|----------------|---------------------------------|----------------------------------|----------------|---------------------------------|
|       |                           | $NO/NO_2$ (UV-Vis. spectroscopy) | $N_2O$ (GC-MS) | $NH_4^+$ (UV-Vis. spectroscopy) | $NO/NO_2$ (UV-Vis. spectroscopy) | $N_2O$ (GC-MS) | $NH_4^+$ (UV-Vis. spectroscopy) |
| 1.    | Ar (99.99%, Sigma)        | 0.6 ppm                          | <0.01 ppm      | -                               | -                                | NA             | NA                              |
| 2.    | $^{14}N_2$ (99.99% Sigma) | 1.1 ppm                          | 0.06 ppm       | 0.09 ppm                        | <0.01 ppm                        | <0.01 ppm      | -                               |
| 3.    | $^{15}N_2$ (98%, Sigma)   | 1.2 ppm                          | 0.07 ppm       | 0.08 ppm                        | <0.01 ppm                        | <0.01 ppm      | -                               |

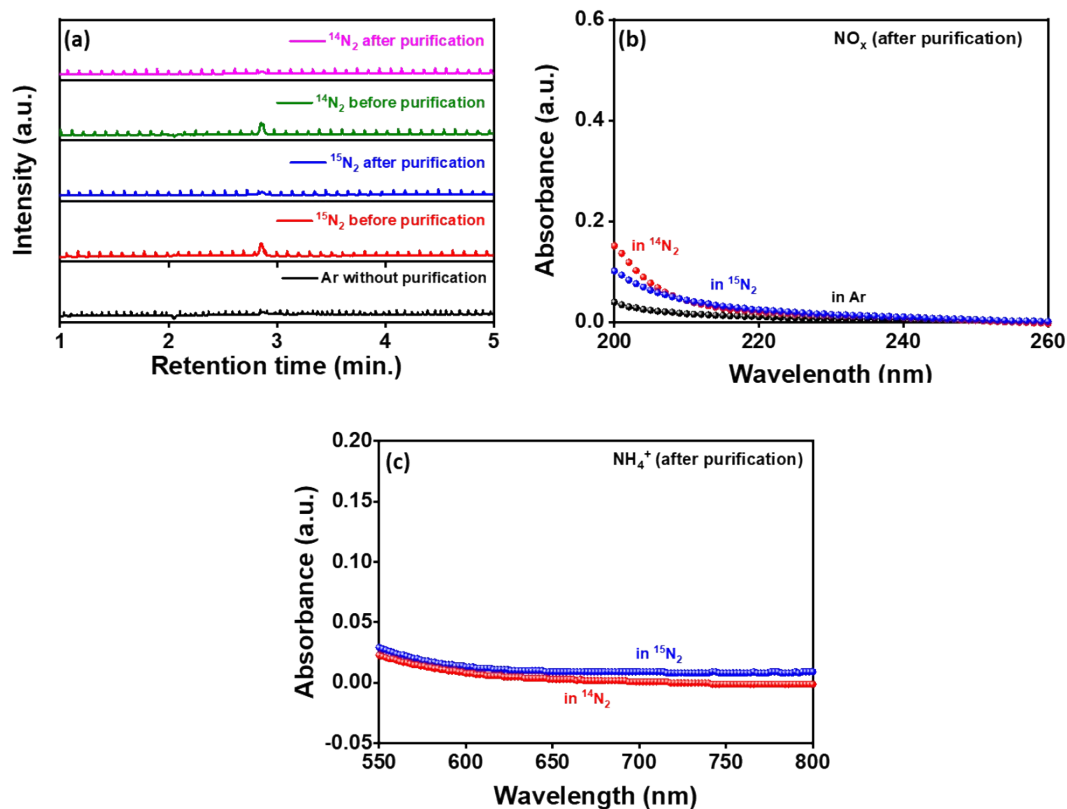

**Fig. S13** (a) Chromatograms for Ar/ $^{14}\text{N}_2$ / $^{15}\text{N}_2$  gas-supplies before and after purification for  $\text{N}_2\text{O}$  quantification. UV-Vis. absorbance curves obtained after passing gas-supplies (Ar/ $^{14}\text{N}_2$ / $^{15}\text{N}_2$ ) through the (b) alkaline  $\text{KMnO}_4$  solution to trap  $\text{NO}_x$  impurities and (c) acid trap to test  $\text{NH}_4^+$  impurities.

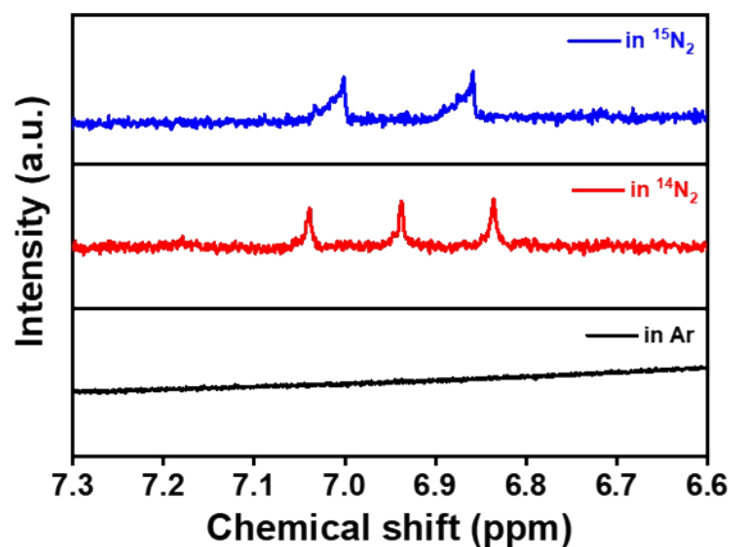

**Fig. S14**  $^1\text{H}$ -NMR spectrum acquired after 2 h isotope labelling NRR experiment by  $\text{Co}_2\text{B}$  (1:8) under different gas-supply (Ar/ $^{14}\text{N}_2$ / $^{15}\text{N}_2$ ) saturated electrolyte solutions.

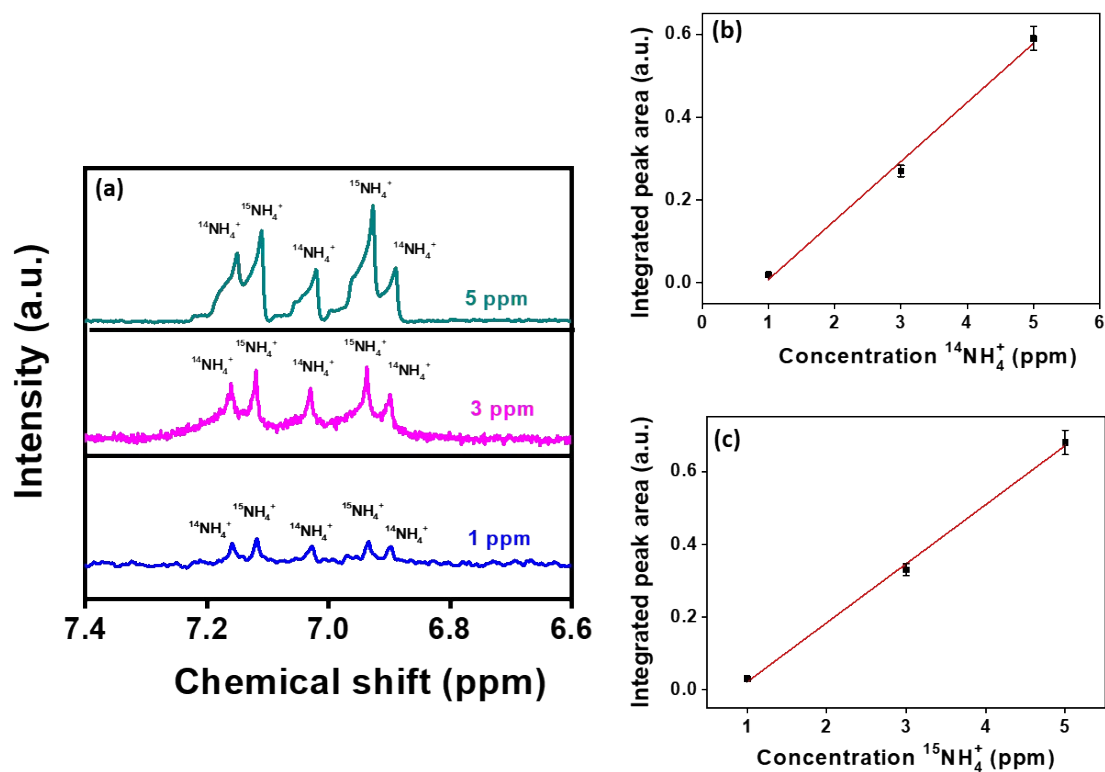

**Fig. S15A** Standard calibration curve extracted from <sup>1</sup>H-NMR spectrum (a) for (b) <sup>14</sup>NH<sub>4</sub><sup>+</sup> and (c) <sup>15</sup>NH<sub>4</sub><sup>+</sup> solutions with varying concentrations.

**Table S4.** Comparison of NH<sub>3</sub> yield rates obtained after NRR isotope labelling experiments by Co<sub>2</sub>B (1:8) catalyst via different quantification methods.

| S.No. | Quantification method | <sup>14</sup> NH <sub>4</sub> <sup>+</sup> yield rate<br>(mg h <sup>-1</sup> mg <sub>cat.</sub> <sup>-1</sup> ) | <sup>15</sup> NH <sub>4</sub> <sup>+</sup> yield rate<br>(mg h <sup>-1</sup> mg <sub>cat.</sub> <sup>-1</sup> ) |
|-------|-----------------------|-----------------------------------------------------------------------------------------------------------------|-----------------------------------------------------------------------------------------------------------------|
|       |                       |                                                                                                                 |                                                                                                                 |

|    |                                         |      |      |
|----|-----------------------------------------|------|------|
| 1. | Indophenol blue                         | 2.94 | 2.93 |
| 2. | <sup>1</sup> H-NMR spectroscopy         | 2.94 | 2.93 |
| 3. | Liquid chromatography-mass spectroscopy | 2.98 | 2.95 |

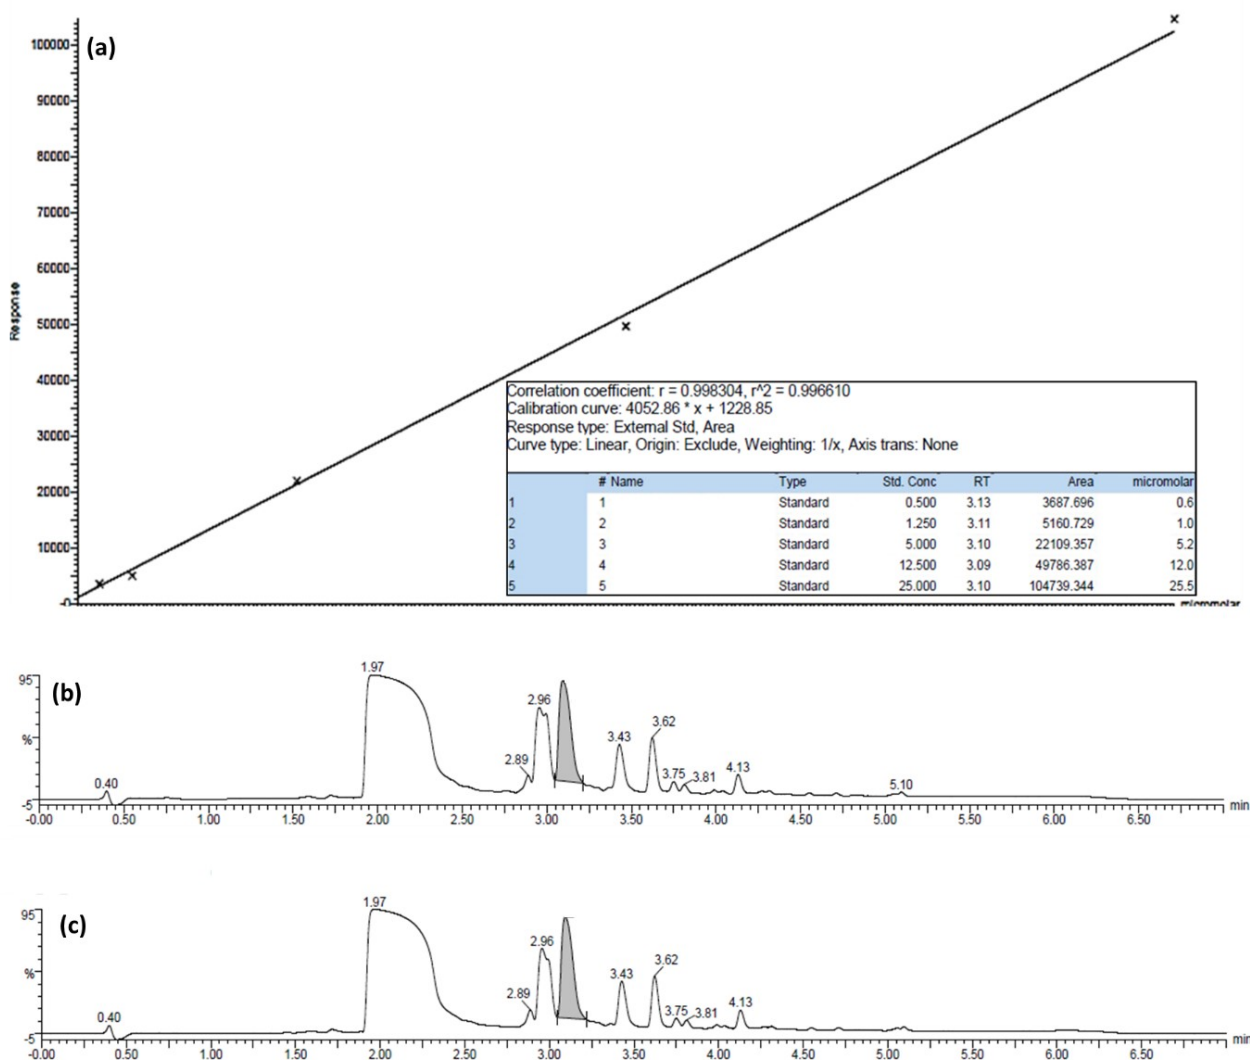

**Fig. S15B** (a) Standard calibration curve obtained for standard Indophenol red solutions with varying concentrations (0.1 to 5 ppm), liquid chromatogram for electrolyte solution after NRR performed in (a) <sup>14</sup>N<sub>2</sub>- and (b) <sup>15</sup>N<sub>2</sub>-saturated 0.1 M KOH solution.

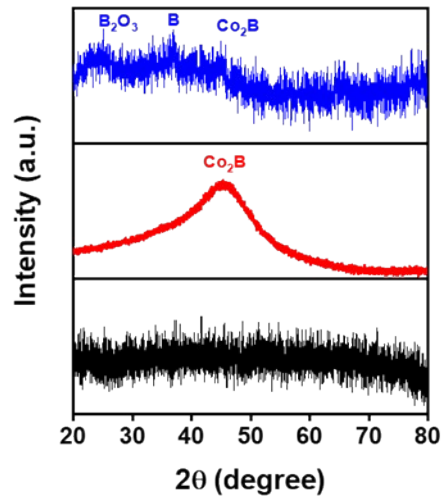

**Fig. S16A** Powder X-ray diffraction patterns of  $\text{Co}_2\text{B}$  [black:  $\text{Co}_2\text{B}$  (1:4); red:  $\text{Co}_2\text{B}$  (1:8); blue:  $\text{Co}_2\text{B}$  (1:12)].

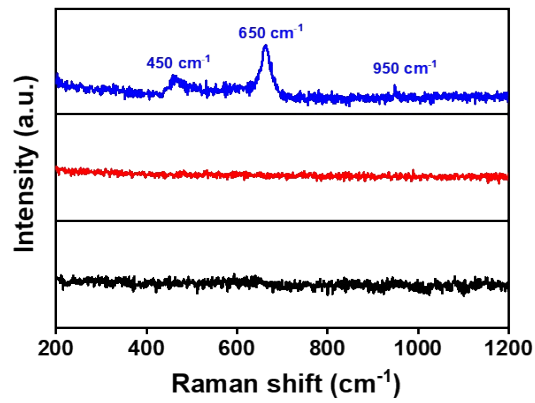

**Fig. S16B** Raman spectrum for  $\text{Co}_2\text{B}$  catalysts.

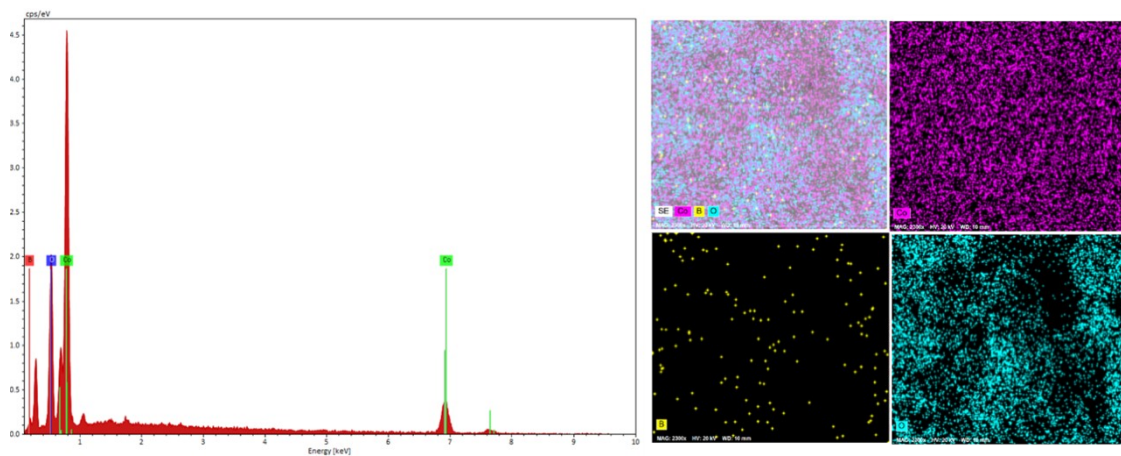

**Fig. S17** EDS spectra and dot mapping analysis for  $\text{Co}_2\text{B}$  (1:8) catalyst.

**Table S5A.** EDS Composition analysis (at.%) for Co<sub>2</sub>B (1:8).

| Catalyst                | Cobalt | Boron | Oxygen |
|-------------------------|--------|-------|--------|
| Co <sub>2</sub> B (1:8) | 47.76  | 26.07 | 26.17  |

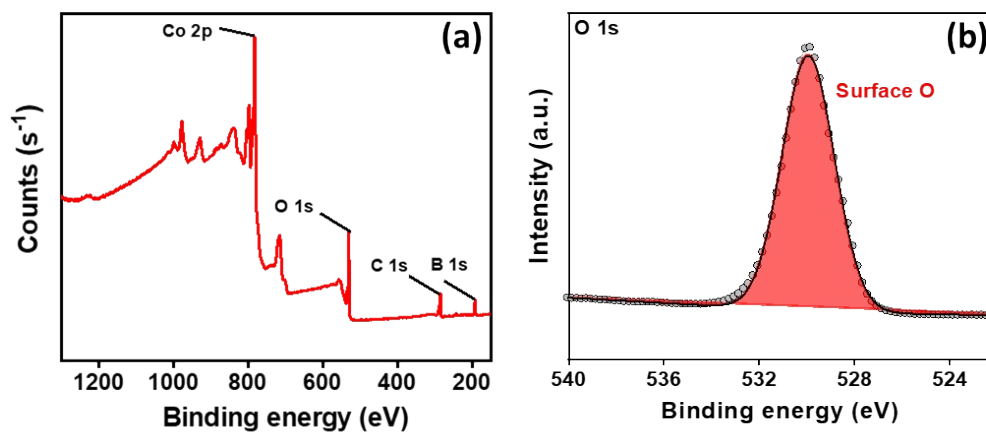

**Fig. S18** (a) XP survey spectrum and (b) O 1s deconvoluted XP spectrum of Co<sub>2</sub>B (1:8).

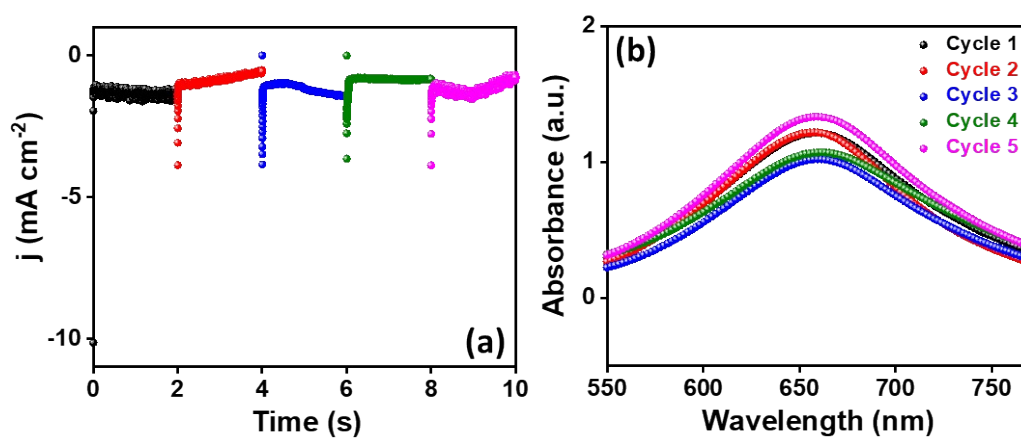

**Fig. S19** (a) Chronoamperometric curves obtained for Co<sub>2</sub>B (1:8) at -0.3 V vs. RHE for 10 h and (b) respective absorbance values obtained after quantification by Indophenol blue method.

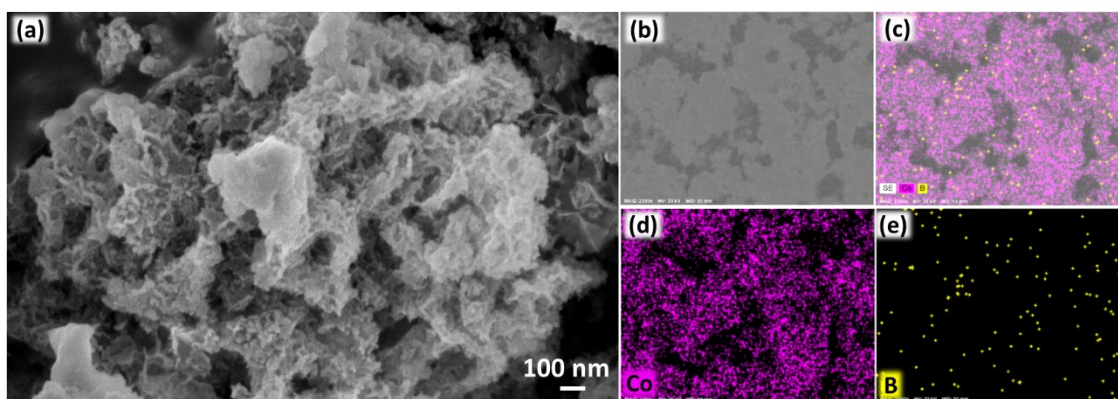

**Fig. S20** (a) SEM image and (b-e) EDS dot mapping showing presence of both Co and B for Co<sub>2</sub>B (1:8) after stability test for NRR.

### Computational Methodology

We have carried out density functional theory (DFT) based electronic structure calculations<sup>35, 36</sup> using Vienna *ab-initio* simulation package (VASP) code throughout the theoretical investigation.<sup>37</sup> The projector augmented-wave (PAW) formalism<sup>38</sup> is used, while the exchange and correlation potential is described through generalized gradient approximation using Perdew- Burke-Ernzerhof (PBE) functional<sup>39</sup> The kinetic energy cut-off corresponding to the plane wave basis set has been used as 500 eV. All the surface configurations along with the surface-adsorbate systems are fully relaxed while achieving the minimum-energy criteria until the Hellman-Feynman forces become less than 0.01 eV/Å. We have constructed the Co<sub>2</sub>B surface along [001] direction while considering 15 Angstrom vacuum along z-direction, which will remove the interaction between periodic images. The Brillouin zone has been sampled using 5×5×1 Monkhorst-Pack k- mesh for structural optimization for surface calculations.<sup>40</sup>

**Table S5B.** Adsorption free energy values calculated from DFT model for NRR over “Co” in Co<sub>2</sub>B (1:8) catalyst.

| Structure                             | E <sub>surface + adsorbate</sub> (eV) | E <sub>Surface</sub> (eV) | E <sub>adsorbate</sub> (eV) | E <sub>adsorption energy</sub> (eV) | ΔG <sub>Free energy</sub> (eV) at 0 V | ΔG <sub>Free energy</sub> (eV) at -0.3 V |
|---------------------------------------|---------------------------------------|---------------------------|-----------------------------|-------------------------------------|---------------------------------------|------------------------------------------|
| N <sub>2</sub> * on Co                | -166.206473                           | -145.05757                | -16.657685                  | -4.4912184                          | -4.9322184                            | -4.6322184                               |
| N <sub>2</sub> H* on Co               | -171.4847209                          | -145.05757                | -18.017425                  | -8.4097255                          | -8.0487255                            | -7.7487255                               |
| N <sub>2</sub> H <sub>2</sub> * on Co | -172.6671155                          | -145.05757                | -21.084547                  | -6.5249982                          | -6.2349982                            | -5.9349982                               |
| N* on Co                              | -160.8272799                          | -145.05757                | -8.3288429                  | -7.4408675                          | -7.6218675                            | -7.3218675                               |
| NH* on Co                             | -159.9010614                          | -145.05757                | -8.1026962                  | -6.7407957                          | -6.64779574                           | -6.34779574                              |
| NH <sub>2</sub> * on Co               | -167.6530729                          | -145.05757                | -13.525779                  | -9.0697238                          | -8.67172382                           | -8.37172382                              |
| NH <sub>3</sub> * on Co               | -169.5893949                          | -145.05757                | -19.533373                  | -4.99845196                         | -4.16145196                           | -3.86145196                              |
| H* on Co                              | -156.1036094                          | -145.05757                | -3.3852118                  | -7.660828035                        | -7.42082803                           | -7.12082803                              |



To support the adsorption of NRR intermediates on the Co site, another adsorption has been performed on the B site. The outcomes show that the  $N_2$  adsorption process is more favorable on the Co site.

**Table S5C.** Adsorption free energy values calculated from DFT model for NRR over “B” in  $Co_2B$  (1:8) catalyst.

| Structure       | $E_{\text{surface adsorbate}}$ (eV) | $E_{\text{Surface}}$ (eV) | $E_{\text{adsorbate}}$ (eV) | $E_{\text{adsorption energy}}$ (eV) | $\Delta G_{\text{Free energy}}$ (eV) at 0 V | $\Delta G_{\text{Free energy}}$ (eV) at -0.3 V |
|-----------------|-------------------------------------|---------------------------|-----------------------------|-------------------------------------|---------------------------------------------|------------------------------------------------|
| $N_2^*$ on B    | -162.410528                         | -145.05757                | -16.657685                  | -0.6952734                          | -1.1362734                                  | -0.8362734                                     |
| $N_2H^*$ on B   | -168.495766                         | -145.05757                | -18.017425                  | -5.4207707                          | -5.0597707                                  | -4.7597707                                     |
| $N_2H_2^*$ on B | -170.536490                         | -145.05757                | -21.084547                  | -4.3943734                          | -4.1043734                                  | -3.8043734                                     |
| $N^*$ on B      | -157.563482                         | -145.05757                | -8.3288429                  | -4.1770703                          | -4.3580703                                  | -4.0580703                                     |
| $NH^*$ on B     | -159.854048                         | -145.05757                | -8.1026962                  | -6.6937823                          | -6.6007823                                  | -6.3007823                                     |
| $NH_2^*$ on B   | -165.919044                         | -145.05757                | -13.525779                  | -7.3356955                          | -6.9376955                                  | -6.6376955                                     |
| $NH_3^*$ on B   | -166.713559                         | -145.05757                | -19.533373                  | -2.1226165                          | -1.2856165                                  | -0.9856165                                     |
| $H^*$ on B      | -153.040994                         | -145.05757                | -3.3852118                  | -4.5982128                          | -4.3582128                                  | -4.0582128                                     |

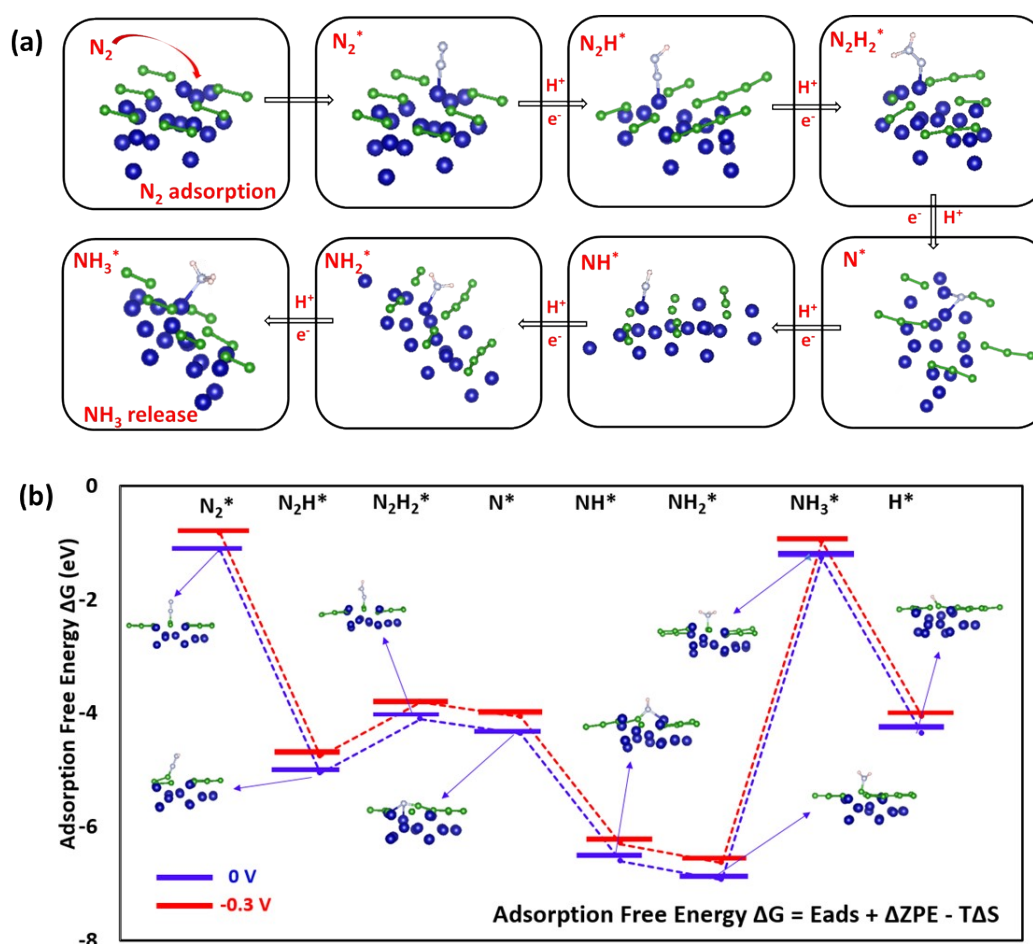

**Fig. S21** (a) Optimized configurations of different reaction intermediates during NRR on Co sites of  $Co_2B$  surface via end-on adsorption and (b) Reaction coordinate corresponding to  $N_2$  reduction to  $NH_3$  on B site of  $Co_2B$  catalyst surface.

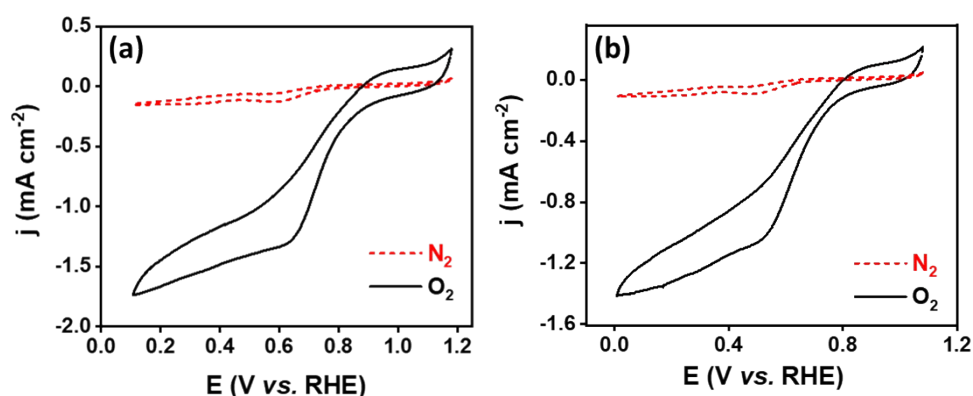

**Fig. S22** Cyclic voltammograms of (a) Co<sub>2</sub>B (1:4) and (b) Co<sub>2</sub>B (1:12) in N<sub>2</sub>- and O<sub>2</sub>- saturated 0.1 M KOH electrolyte solution.

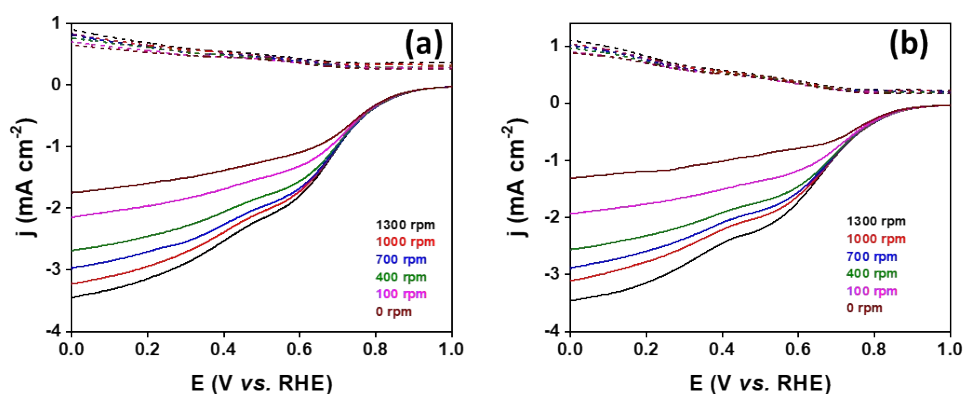

**Fig. S23** RDE polarization curves of (a) Co<sub>2</sub>B (1:4) and (b) Co<sub>2</sub>B (1:12) during ORR at different rotation rates varying from 0 to 1300 rpm at a sweep rate of 5 mV s<sup>-1</sup>.

**Table S6A.** ORR performance comparison of Co<sub>2</sub>B catalysts in O<sub>2</sub>-saturated 0.1 M KOH

| Catalyst                 | Onset potential@-0.1 mA cm <sup>-2</sup> | Half wave potential | Current density (at 0.2 V) |
|--------------------------|------------------------------------------|---------------------|----------------------------|
| Co <sub>2</sub> B (1:4)  | 0.89 V                                   | 0.69 V              | -3.37 mA cm <sup>-2</sup>  |
| Co <sub>2</sub> B (1:8)  | 0.98 V                                   | 0.83 V              | -4.9 mA cm <sup>-2</sup>   |
| Co <sub>2</sub> B (1:12) | 0.86 V                                   | 0.66 V              | -3.38 mA cm <sup>-2</sup>  |

electrolyte solution.

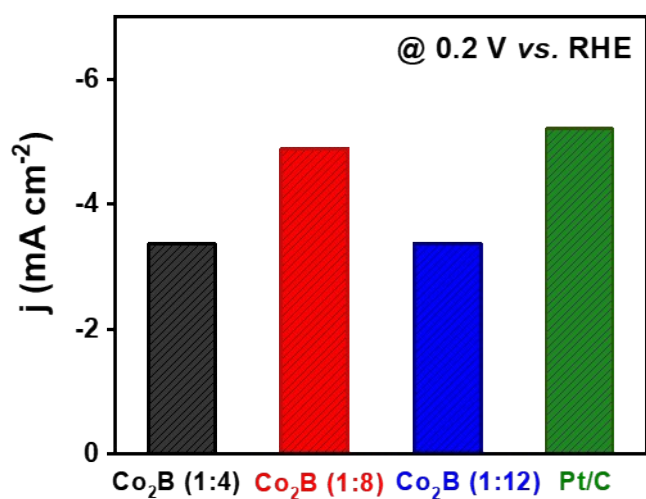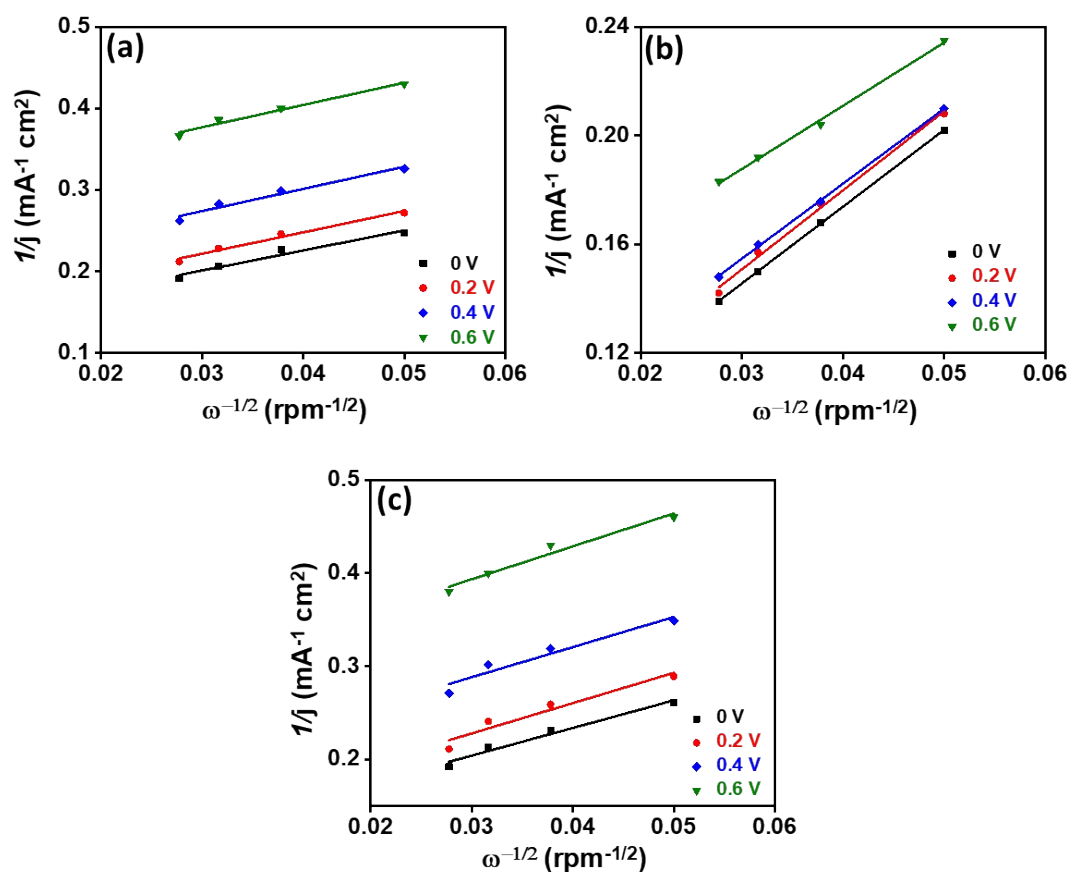

Fig. S24 Bar diagram comparison for diffusion limited current density during ORR.

Fig. S25 Koutecky-Levich plots derived from corresponding LSV of (a) Co<sub>2</sub>B (1:4), (b) Co<sub>2</sub>B (1:8), and (c) Co<sub>2</sub>B (1:12) respectively.

**Table S6B.** Total number of electrons transferred and simultaneous H<sub>2</sub>O<sub>2</sub> production during ORR by Co<sub>2</sub>B catalysts.

| Catalyst                 | n (O <sub>2</sub> ) |       |       |       | H <sub>2</sub> O <sub>2</sub> (%) |       |       |       |
|--------------------------|---------------------|-------|-------|-------|-----------------------------------|-------|-------|-------|
|                          | 0 V                 | 0.2 V | 0.4 V | 0.6 V | 0 V                               | 0.2 V | 0.4 V | 0.6 V |
| Co <sub>2</sub> B (1:4)  | 3.6                 | 3.7   | 3.71  | 2.892 | 20.19                             | 14.51 | 14.07 | 55.38 |
| Co <sub>2</sub> B (1:8)  | 3.83                | 3.841 | 3.843 | 3.86  | 8.42                              | 7.91  | 7.76  | 6.81  |
| Co <sub>2</sub> B (1:12) | 3.63                | 3.637 | 3.65  | 3.71  | 18.34                             | 18.35 | 17.02 | 14.4  |

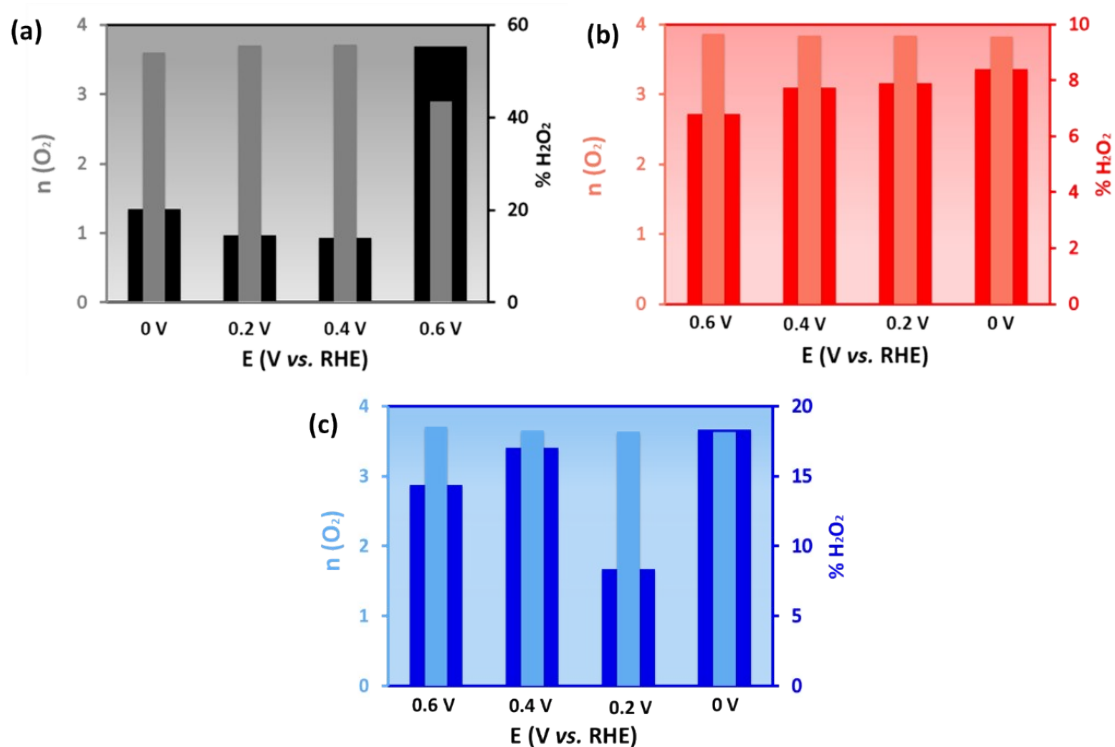

**Fig. S26** Bar diagram representation of H<sub>2</sub>O<sub>2</sub> (%) and no. of electrons transferred during ORR by (a) Co<sub>2</sub>B (1:4), (b) Co<sub>2</sub>B (1:8), and (c) Co<sub>2</sub>B (1:12).

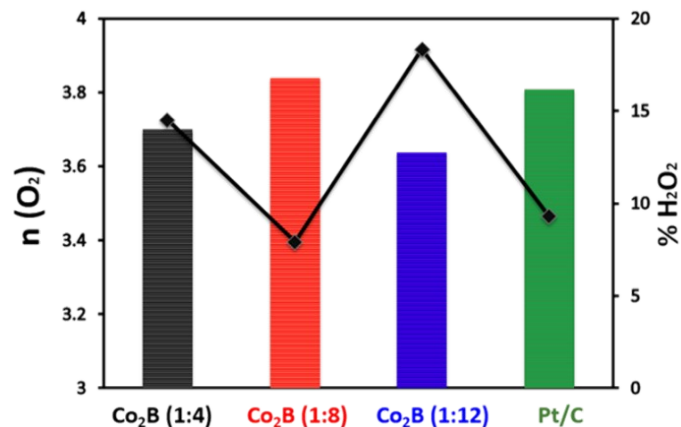

**Fig. S27** Bar diagram comparison of no. of electrons and  $\text{H}_2\text{O}_2$  produced by catalysts @ 0.2 V.

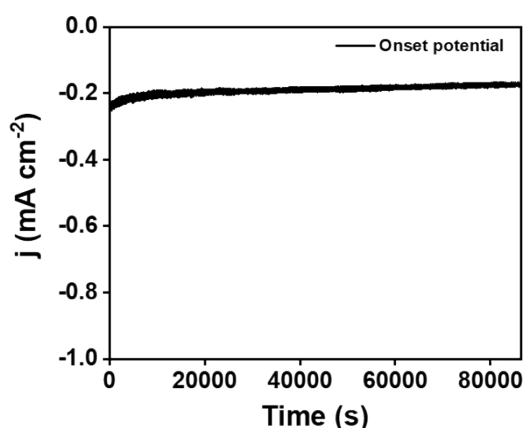

**Fig. S28** Stability test performed for  $\text{Co}_2\text{B (1:8)}$  in  $\text{O}_2$ -saturated 0.1 M KOH for 24 h at a fixed ORR onset potential.

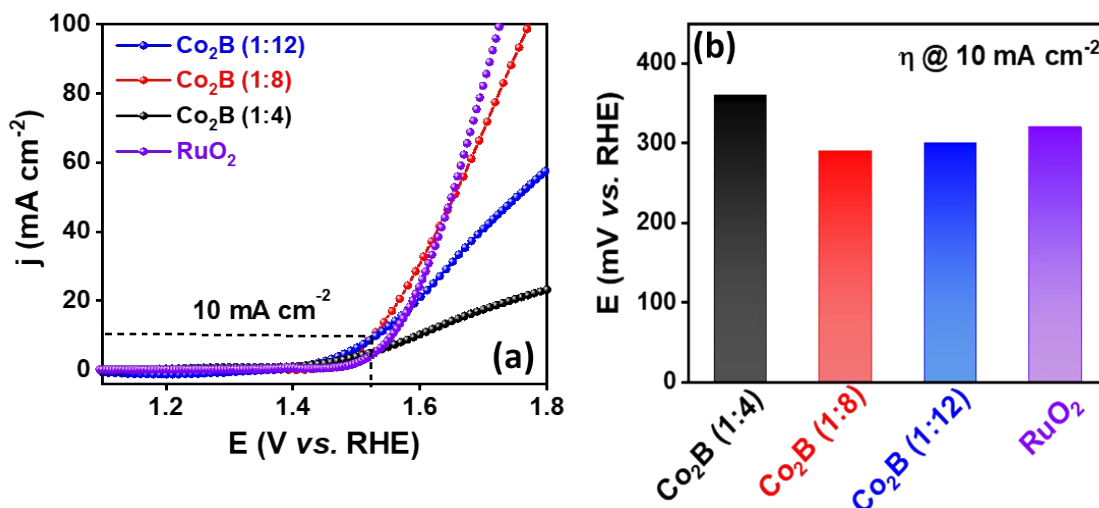

**Fig. S29** (a) LSV polarization curves during OER for variants of  $\text{Co}_2\text{B}$  and benchmark  $\text{RuO}_2$  catalyst at  $10 \text{ mV s}^{-1}$  and (b) Bar diagram representing the comparison of overpotential required by catalysts to reach  $10 \text{ mA cm}^{-2}$  current density.

**Table S7.** OER performance comparison of Co<sub>2</sub>B catalysts in O<sub>2</sub>-saturated 0.1 M KOH electrolyte solution.

| Catalyst                 | Overpotential ( $\eta$ at 10 mA cm <sup>-2</sup> ) | Current density (at 1.75 V vs. RHE) | Tafel slope (mV dec <sup>-1</sup> ) |
|--------------------------|----------------------------------------------------|-------------------------------------|-------------------------------------|
| Co <sub>2</sub> B (1:4)  | 350 mV                                             | 20 mA cm <sup>-2</sup>              | 207                                 |
| Co <sub>2</sub> B (1:8)  | 290 mV                                             | 92.5 mA cm <sup>-2</sup>            | 80                                  |
| Co <sub>2</sub> B (1:12) | 300 mV                                             | 51 mA cm <sup>-2</sup>              | 126                                 |

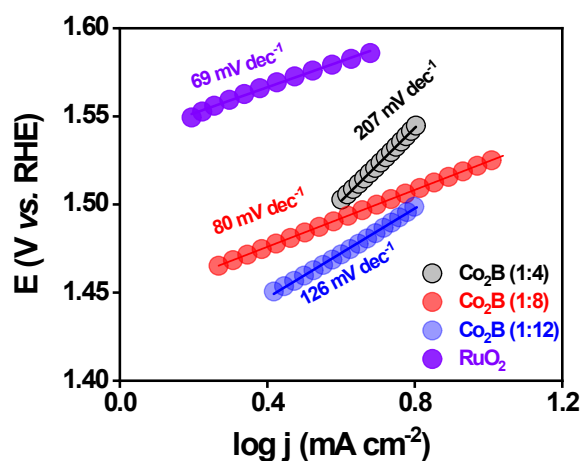

**Fig. S30** Tafel plots derived from Fig. S29a for different catalysts during OER.

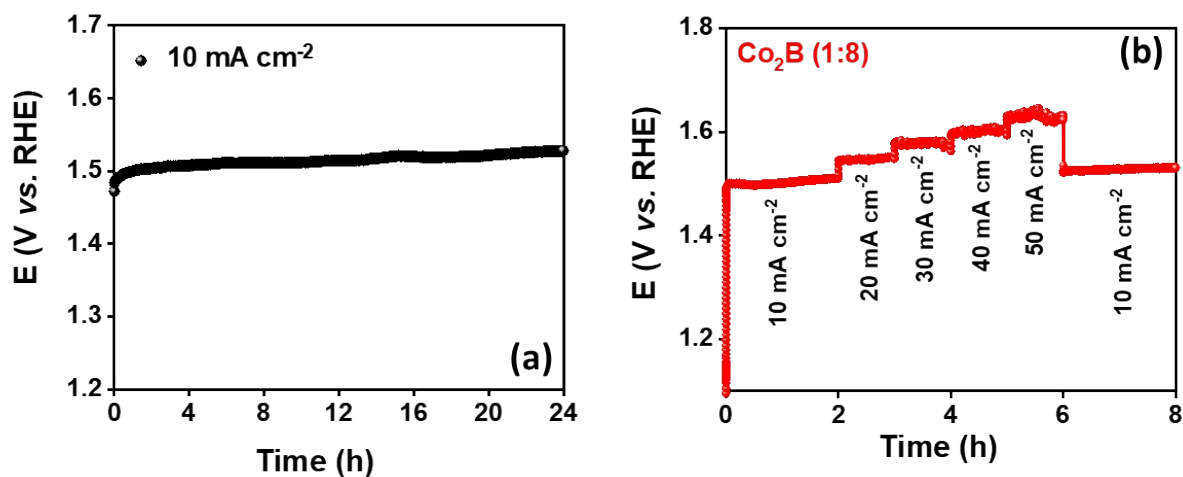

**Fig. S31** (a) Stability tests performed for Co<sub>2</sub>B (1:8) for 24 h at 10 mA cm<sup>-2</sup> current density during OER and (b) Sequential chronopotentiometry performed at different current densities between 10-50 mA cm<sup>-2</sup> for Co<sub>2</sub>B (1:8).

**Table S8.** Comparison of bifunctional activity of Co<sub>2</sub>B catalysts and benchmark catalysts for ORR/OER.

| Catalyst                 | OER overpotential<br>( $E_{j=10 \text{ mA cm}^{-2}}$ ) | ORR half-wave potential<br>( $E_{\text{ORR1/2}}$ ) | Potential gap<br>( $\Delta E = E_j - E_{\text{ORR1/2}}$ ) |
|--------------------------|--------------------------------------------------------|----------------------------------------------------|-----------------------------------------------------------|
| Co <sub>2</sub> B (1:4)  | 1.58 V                                                 | 0.69 V                                             | 0.89                                                      |
| Co <sub>2</sub> B (1:8)  | 1.52 V                                                 | 0.83 V                                             | 0.69                                                      |
| Co <sub>2</sub> B (1:12) | 1.53 V                                                 | 0.66 V                                             | 0.87                                                      |
| Pt/C                     | 1.6 V                                                  | 0.87 V                                             | 0.73                                                      |
| RuO <sub>2</sub>         | 1.55 V                                                 | 0.8 V                                              | 0.75                                                      |

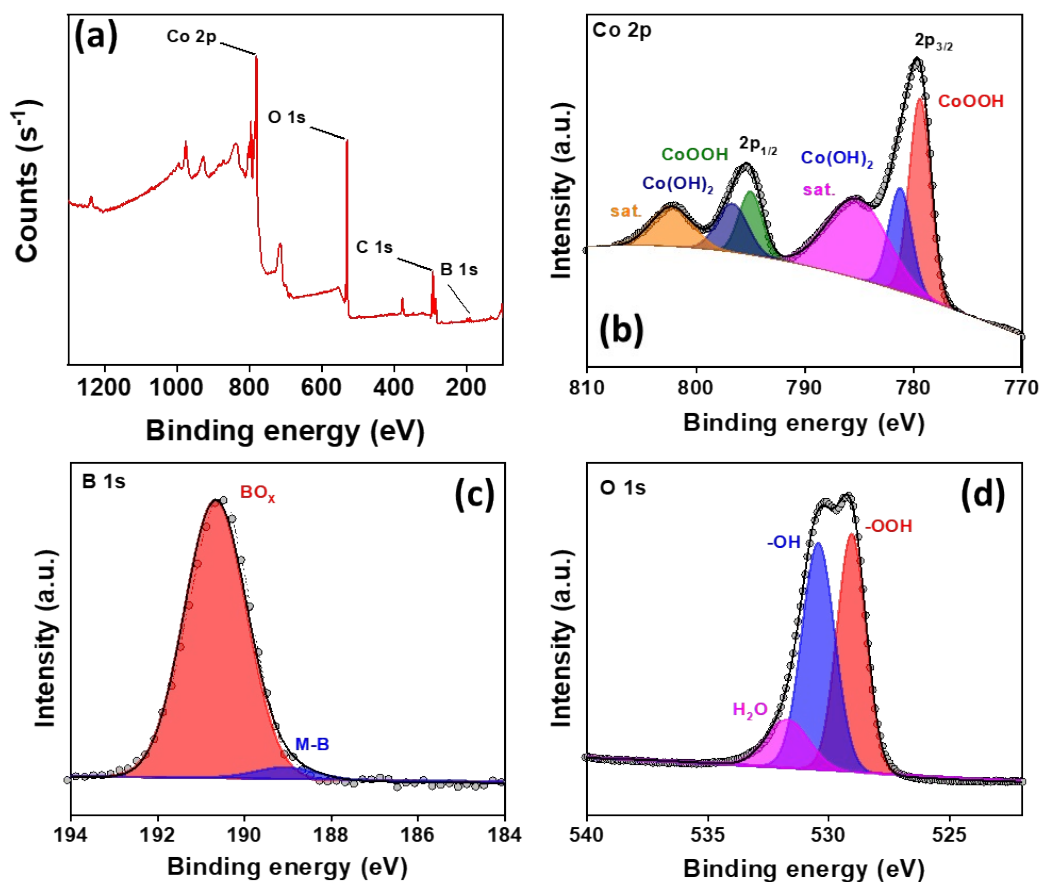

**Fig. S32** (a) Survey spectrum, (b) Co 2p, (c) B 1s and (d) O 1s spectrum of Co<sub>2</sub>B (1:8) after OER stability tests.

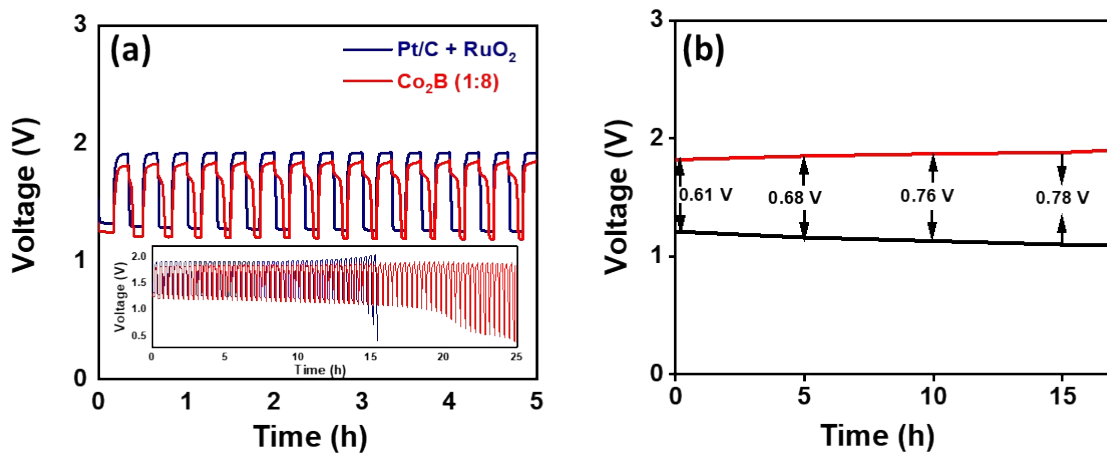

**Fig. S33A** (a) Galvanostatic charge-discharge cycling stability curves for Co<sub>2</sub>B (1:8) and Pt/C+RuO<sub>2</sub> at 10 mA cm<sup>-2</sup> current density (10 min. Charging-10 min. discharging) and (b) Potential gap variation on increased number of charge-discharge cycles during battery performance analysis.

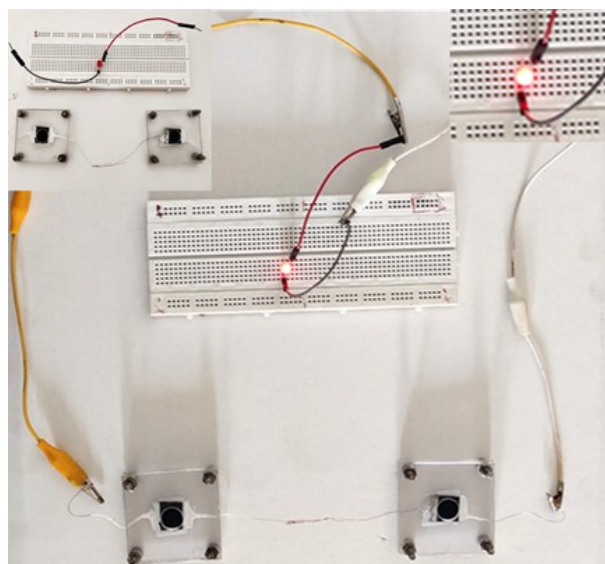

**Fig. S33B** Zn-air battery equipped with Co<sub>2</sub>B (1:8) air cathode assembled in series to light a red LED of 2.0 V (Inset (left): no connection with battery; (right): lightened LED).



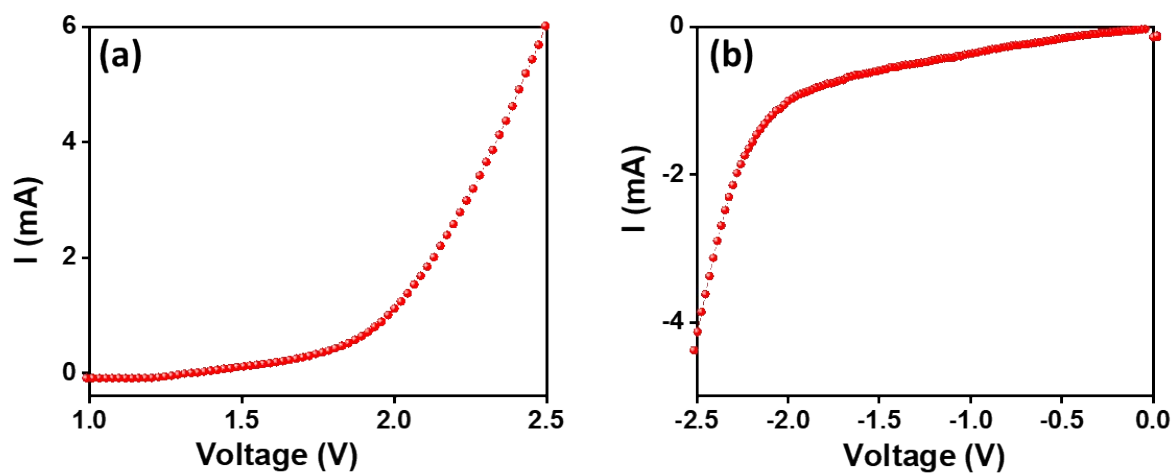

**Fig. S34** LSV acquired under full-cell conditions for overall  $\text{NH}_3$  synthesis (a) anodic sweep, (b) cathodic sweep, showing bifunctional activity of  $\text{Co}_2\text{B}$  (1:8) catalyst towards OER at anode and NRR at cathode.

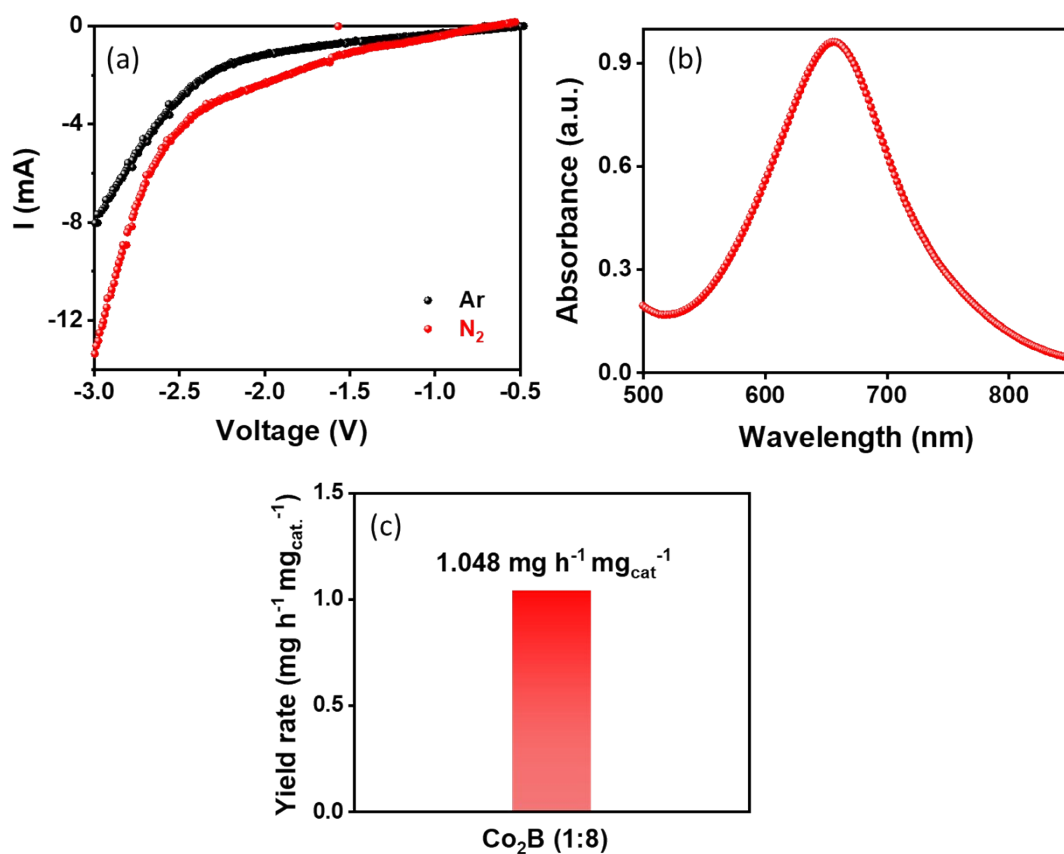

**Fig. S35** (a) LSV for full-cell equipped with Co<sub>2</sub>B (1:8) for NH<sub>3</sub> synthesis, (b) UV-vis curve obtained after quantification by Indophenol blue method and (c) NH<sub>3</sub> yield produced after 2 h of electrolysis by battery powered NH<sub>3</sub> production cell setup.

**Table S9.** Comparison of self-powered electrochemical ammonia synthesis over reported heterogeneous catalysts

| S.No. | Power source               | Power source efficiency                                        |         |                                      |                                          | NH <sub>3</sub> cell setup                                         |          |                  |              |                         |                         |                                                     |          | Ref. |
|-------|----------------------------|----------------------------------------------------------------|---------|--------------------------------------|------------------------------------------|--------------------------------------------------------------------|----------|------------------|--------------|-------------------------|-------------------------|-----------------------------------------------------|----------|------|
|       |                            | Catalyst                                                       | OCV (V) | Power density (mW cm <sup>-2</sup> ) | Specific capacity (mAh g <sup>-1</sup> ) | Half cell                                                          |          |                  | Full cell    |                         |                         |                                                     |          |      |
|       |                            |                                                                |         |                                      |                                          | v <sub>NH<sub>3</sub></sub> (μg h <sup>-1</sup> mg <sup>-1</sup> ) | F.E. (%) | Pot. (V vs. RHE) | Catalyst     | Cathode                 | Anode                   | v <sub>NH<sub>3</sub></sub>                         |          |      |
| 1.    | Zn-air battery             | Nitrogen-doped porous carbon <sup>a</sup>                      | 1.35    | -                                    | -                                        | 1.31 mmol h <sup>-1</sup> g <sup>-1 cat.</sup>                     | 9.98     | -0.4             | -            | NPC-500                 | Carbon cloth            | 1.28 mmol h <sup>-1</sup> g <sup>-1 cat.</sup>      | 41       |      |
| 2.    | Solid state Zn-air battery | Boron, nitrogen and fluorine ternary-doped carbon <sup>a</sup> | 1.48    | 127                                  | 730 @ 5 mA cm <sup>-2</sup>              | 41                                                                 | 14       | -0.4             | Bifunctional | BNF-C                   | BNF-C                   | -                                                   | 42       |      |
| 3.    | Zn-air battery             | Co <sub>2</sub> B nanosheets <sup>a</sup>                      | 1.45    | 500                                  | 889 @ 10 mA cm <sup>-2</sup>             | 2980.22                                                            | 20.45    | -0.3             | Bifunctional | Co <sub>2</sub> B (1:8) | Co <sub>2</sub> B (1:8) | 1068 μg h <sup>-1</sup> mg <sup>-1 cat.</sup> (2 h) | Our work |      |

<sup>a</sup>oxygen bifunctional catalyst  
 OCV: Open circuit voltage; F.E.: Faradaic efficiency; v<sub>NH<sub>3</sub></sub>: NH<sub>3</sub> yield rate; NPC: Nitrogen-doped porous carbon; BNF-C: Boron, nitrogen and fluorine ternary-doped carbon; MSCM: melamine-sponge-based carbon materials; BN-CNF: Boron and nitrogen co-doped porous carbon nanofibers

## References

1. L. Zhang, X. Ji, X. Ren, Y. Ma, X. Shi, Z. Tian, A. M. Asiri, L. Chen, B. Tang and X. Sun, *Adv. Mater.*, 2018, **30**, 1800191.
2. Y. Zhao, R. Shi, X. Bian, C. Zhou, Y. Zhao, S. Zhang, F. Wu, G. I. Waterhouse, L. Z. Wu and C. H. Tung, *Adv. Sci.*, 2019, **6**, 1802109.
3. A. C. Nielander, J. M. McEnaney, J. A. Schwalbe, J. G. Baker, S. J. Blair, L. Wang, J. G. Pelton, S. Z. Andersen, K. Enemark-Rasmussen and V. Colic, *ACS Catal.*, 2019, **9**, 5797-5802.
4. L. Li, C. Tang, D. Yao, Y. Zheng and S.-Z. Qiao, *ACS Energy Lett.*, 2019, **4**, 2111-2116.
5. H. Ren, Y. Pan, C. C. Sorrell and H. Du, *J. Mater. Chem. A*, 2020, **8**, 3154-3159.
6. Y. Fu, K. Li, M. Batmunkh, H. Yu, S. Donne, B. Jia and T. Ma, *ACS Appl. Mater. Interfaces*, 2020, **12**, 44830-44839.
7. W. Li, W. Fang, C. Wu, K. N. Dinh, H. Ren, L. Zhao, C. Liu and Q. Yan, *J. Mater. Chem. A*, 2020, **8**, 3658-3666.
8. T. Chen, S. Liu, H. Ying, Z. Li and J. Hao, *Chem. Asian J.*, 2020, **15**, 1081-1087.
9. W. Zang, T. Yang, H. Zou, S. Xi, H. Zhang, X. Liu, Z. Kou, Y. Du, Y. P. Feng and L. Shen, *ACS Catal.*, 2019, **9**, 10166-10173.
10. Y.-X. Lin, S.-N. Zhang, Z.-H. Xue, J.-J. Zhang, H. Su, T.-J. Zhao, G.-Y. Zhai, X.-H. Li, M. Antonietti and J.-S. Chen, *Nat. Commun.*, 2019, **10**, 1-7.
11. M. Wang, S. Liu, T. Qian, J. Liu, J. Zhou, H. Ji, J. Xiong, J. Zhong and C. Yan, *Nat. Commun.*, 2019, **10**, 341.
12. S. Mukherjee, D. A. Cullen, S. Karakalos, K. Liu, H. Zhang, S. Zhao, H. Xu, K. L. More, G. Wang and G. Wu, *Nano Energy*, 2018, **48**, 217-226.
13. L. Han, X. Liu, J. Chen, R. Lin, H. Liu, F. Lü, S. Bak, Z. Liang, S. Zhao and E. Stavitski, *Angew. Chem.*, 2019, **131**, 2343-2347.

14. H. Wang, Y. Li, C. Li, K. Deng, Z. Wang, Y. Xu, X. Li, H. Xue and L. Wang, *J. Mater. Chem. A*, 2019, **7**, 801-805.
15. F. Pang, Z. Wang, K. Zhang, J. He, W. Zhang, C. Guo and Y. Ding, *Nano Energy*, 2019, **58**, 834-841.
16. H.-M. Liu, S.-H. Han, Y. Zhao, Y.-Y. Zhu, X.-L. Tian, J.-H. Zeng, J.-X. Jiang, B. Y. Xia and Y. Chen, *J. Mater. Chem. A*, 2018, **6**, 3211-3217.
17. Y. Yang, L. Zhang, Z. Hu, Y. Zheng, C. Tang, P. Chen, R. Wang, K. Qiu, J. Mao and T. Ling, *Angew. Chem. Int. Ed.*, 2020, **59**, 4525-4531.
18. Y. Zhao, F. Li, W. Li, Y. Li, C. Liu, Z. Zhao, Y. Shan, Y. Ji and L. Sun, *Angew. Chem. Int. Ed.*, 2021, **60**, 20331-20341.
19. A. Liu, M. Gao, X. Ren, F. Meng, Y. Yang, Q. Yang, W. Guan, L. Gao, X. Liang and T. Ma, *Nanoscale*, 2020, **12**, 10933-10938.
20. A. Liu, X. Liang, Q. Yang, X. Ren, M. Gao, Y. Yang and T. Ma, *ChemPlusChem*, 2021, **86**, 166-170.
21. A. Liu, Q. Yang, X. Ren, M. Gao, Y. Yang, L. Gao, Y. Li, Y. Zhao, X. Liang and T. Ma, *Sustain. Energy Fuels*, 2020, **4**, 5061-5071.
22. W. Guo, Z. Liang, J. Zhao, B. Zhu, K. Cai, R. Zou and Q. Xu, *Small Methods*, 2018, **2**, 1800204.
23. H. Cheng, P. Cui, F. Wang, L. X. Ding and H. Wang, *Angew. Chem.*, 2019, **131**, 15687-15693.
24. G. Li, H. Lin, Z. Pan, Y. Liu and L. An, *Int. J. Energy Res.*, 2021, **45**, 19634-19644.
25. M. Bat-Erdene, G. Xu, M. Batmunkh, A. S. Bati, J. J. White, M. J. Nine, D. Losic, Y. Chen, Y. Wang and T. Ma, *J. Mater. Chem. A*, 2020, **8**, 4735-4739.
26. J.-T. Ren, L. Chen, H.-Y. Wang and Z.-Y. Yuan, *ACS Appl. Mater. Interfaces*, 2021, **13**, 12106-12117.
27. J.-T. Ren, L. Chen, Y. Liu and Z.-Y. Yuan, *J. Mater. Chem. A*, 2021, **9**, 11370-11380.
28. M.-C. Kim, H. Nam, J. Choi, H. S. Kim, H. W. Lee, D. Kim, J. Kong, S. S. Han, S. Y. Lee and H. S. Park, *ACS Catal.*, 2020, **10**, 10577-10584.
29. A. Liu, X. Liang, Q. Yang, X. Ren, M. Gao, Y. Yang and T. Ma, *ChemElectroChem*, 2020, **7**, 4900-4905.
30. H. Huang, F. Li, Q. Xue, Y. Zhang, S. Yin and Y. Chen, *Small*, 2019, **15**, 1903500.
31. J. Yu, X. Ren, J. Lu, H. Bai, X. Wang, J. Hu and H. Huang, *J. Alloys Compd.*, 2022, **902**, 163862.
32. L. Qiao, G. Duan, S. Zhang, Y. Ren, Y. Sun, Y. Tang, P. Wan, R. Pang, Y. Chen and A. G. Russell, *J. Cleaner Prod.*, 2020, **250**, 119525.
33. M. I. Ahmed, L. J. Arachchige, Z. Su, D. B. Hibbert, C. Sun and C. Zhao, *ACS Catal.*, 2022, **12**, 1443-1451.
34. J. Wang, Z. Jiang, G. Peng, E. Hoenig, G. Yan, M. Wang, Y. Liu, X. Du and C. Liu, *Adv. Sci.*, 2022, **9**, 2104857.
35. P. Hohenberg and W. Kohn, *Phys. Rev.*, 1964, **136**, B864.
36. W. Kohn and L. J. Sham, *Phys. Rev.*, 1965, **140**, A1133.
37. G. Kresse and J. Furthmüller, *Phys. Rev. B*, 1996, **54**, 11169.
38. P. E. Blöchl, *Physical Rev. B*, 1994, **50**, 17953.
39. J. P. Perdew, K. Burke and M. Ernzerhof, *Phys. Rev. Lett.*, 1996, **77**, 3865.
40. H. J. Monkhorst and J. D. Pack, *Phys. Rev. B*, 1976, **13**, 5188.
41. C. Zhao, S. Zhang, M. Han, X. Zhang, Y. Liu, W. Li, C. Chen, G. Wang, H. Zhang and H. Zhao, *ACS Energy Lett.*, 2019, **4**, 377-383.
42. Q. Zhang, F. Luo, Y. Ling, S. Xiao, M. Li, K. Qu, Y. Wang, J. Xu, W. Cai and Z. Yang, *J. Mater. Chem. A*, 2020, **8**, 8430-8439.
